# Supplementary material for: Realist evaluation of a theory-based life skills programme aiming to prevent addictive behaviours in adolescents: the ERIEAS study protocol
Source: PubMed Central journal article supplement — BMJ Open. 2020 Jun 29;10(6):e034530. doi: 10.1136/bmjopen-2019-034530 (PMC7328977; doi:10.1136/bmjopen-2019-034530), 2020-06-29
Supplement: bmjopen-2019-034530.draft_revisions.pdf [file bmjopen-2019-034530.draft_revisions.pdf]

# BMJ Open

BMJ Open is committed to open peer review. As part of this commitment we make the peer review history of every article we publish publicly available.

When an article is published we post the peer reviewers' comments and the authors' responses online. We also post the versions of the paper that were used during peer review. These are the versions that the peer review comments apply to.

The versions of the paper that follow are the versions that were submitted during the peer review process. They are not the versions of record or the final published versions. They should not be cited or distributed as the published version of this manuscript.

BMJ Open is an open access journal and the full, final, typeset and author-corrected version of record of the manuscript is available on our site with no access controls, subscription charges or pay-per-view fees (<http://bmjopen.bmj.com>).

If you have any questions on BMJ Open's open peer review process please email [info.bmjopen@bmj.com](mailto:info.bmjopen@bmj.com)

# BMJ Open

## Realist evaluation of a theory-based life skills program aiming to prevent addictive behaviors in adolescents: The ERIEAS study protocol

|                               |                                                                                                                                                                                                                                                                                                                                                                                                                                                                                                                |
|-------------------------------|----------------------------------------------------------------------------------------------------------------------------------------------------------------------------------------------------------------------------------------------------------------------------------------------------------------------------------------------------------------------------------------------------------------------------------------------------------------------------------------------------------------|
| Journal:                      | <i>BMJ Open</i>                                                                                                                                                                                                                                                                                                                                                                                                                                                                                                |
| Manuscript ID                 | bmjopen-2019-034530                                                                                                                                                                                                                                                                                                                                                                                                                                                                                            |
| Article Type:                 | Protocol                                                                                                                                                                                                                                                                                                                                                                                                                                                                                                       |
| Date Submitted by the Author: | 24-Sep-2019                                                                                                                                                                                                                                                                                                                                                                                                                                                                                                    |
| Complete List of Authors:     | Martin-Fernandez, Judith; ISPED, Chaire de prévention<br>Affret, Aurelie; ISPED, Chaire de prévention<br>Martel, Emma; University of Bordeaux Faculty of Medical Sciences<br>Gallard, Romain; ISPED<br>merchadou, Laurence; INSERM Bordeaux Population Health Research Center<br>Moinot, Laetitia; i, INSERM Bordeaux Population Health Research Center<br>Termote, Monique; INSERM Bordeaux Population Health Research Center<br>Dejarnac, Vincent; CHU de Bordeaux<br>ALLA, François<br>Cambon, Linda; ISPED |
| Keywords:                     | Life skills, Addictions, Realist evaluation                                                                                                                                                                                                                                                                                                                                                                                                                                                                    |
|                               |                                                                                                                                                                                                                                                                                                                                                                                                                                                                                                                |

SCHOLARONE™  
Manuscripts

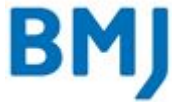

I, the Submitting Author has the right to grant and does grant on behalf of all authors of the Work (as defined in the below author licence), an exclusive licence and/or a non-exclusive licence for contributions from authors who are: i) UK Crown employees; ii) where BMJ has agreed a CC-BY licence shall apply, and/or iii) in accordance with the terms applicable for US Federal Government officers or employees acting as part of their official duties; on a worldwide, perpetual, irrevocable, royalty-free basis to BMJ Publishing Group Ltd ("BMJ") its licensees and where the relevant Journal is co-owned by BMJ to the co-owners of the Journal, to publish the Work in this journal and any other BMJ products and to exploit all rights, as set out in our [licence](#).

The Submitting Author accepts and understands that any supply made under these terms is made by BMJ to the Submitting Author unless you are acting as an employee on behalf of your employer or a postgraduate student of an affiliated institution which is paying any applicable article publishing charge ("APC") for Open Access articles. Where the Submitting Author wishes to make the Work available on an Open Access basis (and intends to pay the relevant APC), the terms of reuse of such Open Access shall be governed by a Creative Commons licence – details of these licences and which [Creative Commons](#) licence will apply to this Work are set out in our licence referred to above.

Other than as permitted in any relevant BMJ Author's Self Archiving Policies, I confirm this Work has not been accepted for publication elsewhere, is not being considered for publication elsewhere and does not duplicate material already published. I confirm all authors consent to publication of this Work and authorise the granting of this licence.

1  
2  
3 1 Realist evaluation of a theory-based life skills program aiming to prevent addictive behaviors in adolescents: The  
4  
5 2 ERIEAS study protocol  
6  
7 3

8  
9 4 Judith Martin Fernandez<sup>1 2\*</sup>, Aurélie Affret<sup>1 2\*</sup>, Emma Martel<sup>1 3</sup>, Romain Gallard<sup>1 2</sup>, Laurence Merchadou<sup>2</sup>,  
10  
11 5 Laetitia Moinot<sup>2</sup>, Monique Termote<sup>2</sup>, Vincent Dejarnac<sup>4</sup>, François Alla<sup>2</sup>, Linda Cambon<sup>1 2</sup>  
12

13 6 \* First co-authors  
14  
15 7

16  
17 8 <sup>1</sup> Chaire de prévention ISPED/SPF, University of Bordeaux, Bordeaux, France

18  
19 9 <sup>2</sup> INSERM Bordeaux Population Health Research Center, UMR 1219, CIC1401-EC, University of Bordeaux,  
20 10 ISPED, 33000, Bordeaux, France.

21 11  
22 12 <sup>3</sup> University of Bordeaux, ISPED, F-33000 Bordeaux, France

23 13  
24 14 <sup>4</sup> DRCI, CHU of Bordeaux, Bordeaux, France  
25 15

26 16 Corresponding author:

27  
28 17 Judith Martin-Fernandez

29 18  
30 19 Mob.+33664701772 / Tel.0557571043

31 20  
32 21 [judith.martin-fernandez@u-bordeaux.fr](mailto:judith.martin-fernandez@u-bordeaux.fr)  
33 22  
34 23  
35  
36  
37  
38 24  
39  
40  
41 25  
42  
43 26  
44  
45  
46 27  
47  
48  
49  
50  
51  
52  
53  
54  
55  
56  
57  
58  
59  
60

## 28 **ABSTRACT**

### 29 **Introduction**

30 Adolescence is a sensitive life stage where tobacco, alcohol and cannabis are used as a way to learn and take on  
31 roles. Prevention programs for youths that work on changing representations about those products and helping  
32 with life skills mobilization are of interest. Unfortunately, among existing programs, few of them are evidence-  
33 based.

34 In France, a program named *Expériences Animées* has been developed. It is inspired by life skills development  
35 programs that have proven to be successful. EA program involves supervised animated short movies and talks  
36 with high school and secondary school pupils about the use of psychoactive substances and addictions. It aims to  
37 delay psychoactive substances initiation; prevent adolescents from becoming regular consumers; reduce the risks  
38 and harm relating to those substances use; open the way for adapted support measures.

39 We are interested in understanding how and under what circumstances, through which mechanisms and among  
40 which adolescents EA program works. For that purpose, we developed the ERIEAS study. The article presents its  
41 protocol, based on a realist evaluation.

### 43 **Methods and analysis**

44 EA will be conducted in 10 establishments (high schools and secondary schools). A multi-case approach  
45 will be adopted and based on the contribution analysis paradigm, the aim being to develop and adjust  
46 an intervention theory. The study comes under the theory-driven evaluation framework. The  
47 investigation methodology will include 4 stages: i) elaboration of a middle-range theory, ii) data collection  
48 for validating/adjusting the theory, iii) data analysis, iv) refinement and adjustment of the middle-range  
49 theory, and definition of the program's key functions.

### 50 **Ethics and dissemination**

1  
2  
3 51 The study will offer to health authorities' evidence-based results to help with health promotion politics roll-out in  
4  
5 52 schools. It will provide knowledge about the strategic configurations most able to lead to life skills mobilization  
6  
7 53 and change young people's representations about substances use.  
8  
9

10 54 This research has received funding from the French National Cancer Institute (INCA) n° CAMBON-  
11  
12  
13 55 2019-008. The project will be carried out with full respect of current relevant legislation (e.g. the Charter  
14  
15  
16 56 of Fundamental Rights of the EU) and international conventions (e.g. Helsinki Declaration). It follows  
17  
18  
19 57 the relevant French legislation of the research category on interventional research protocol involving the  
20  
21  
22 58 human person (3° of Article L. 1121-1 of the Public Health Code). The protocol was approved by the  
23  
24  
25 59 Comité et Protection des Personnes (CPP) i.e. Committee for the Protection of Persons CPP SUD-EST  
26  
27  
28 60 VI n°: AU 1525 and was reported to the Agence Française de Sécurité Sanitaire des Produits de Santé  
29  
30  
31 61 (ANSM) i.e. the French National Agency for the Safety of Health Products. It is in conformity with  
32  
33  
34 62 reference methodology MR003 of Bordeaux University Hospital (CNIL n° 2026779v0). This research  
35  
36  
37 63 has been registered on the site <http://clinicaltrials.gov/> and in the European database ID-RCB under no  
38  
39  
40 64 2019-A01003-54.  
41  
42  
43  
44  
45

46 66 **Strengths and limitations of this study:**  
47  
48

- 49 67 • Develop alcohol, tobacco and cannabis prevention programs for youths that work on changing  
50  
51 68 representations about those products and consumptions is crucial, these programs should be  
52  
53 69 evidence based and focused on helping life skills mobilization such as resistance and self-  
54  
55 70 regulation.  
56  
57  
58  
59  
60

- 1  
2  
3 71 • Consistent with the « bottom-up » approaches, our study -a realist evaluation based on a  
4  
5 72 natural experiment mobilizing mixed-models methods and a preference stated method (DCE)-  
6  
7 73 is an innovative way of evaluating a complex intervention.  
8  
9  
10 74 • The conclusions will be highly replicable and will offer a basis for designing other interventions  
11  
12 75 using identified key functions.  
13

14 76  
15 77  
16 78 **KEYWORDS**

17  
18  
19 79 Life skills; Addictions; Adolescents; Program, Realist evaluation; Complex intervention; Prevention; Public  
20  
21 80 health

22  
23  
24 81 Word count : 6533

25  
26  
27 82  
28  
29  
30  
31  
32  
33  
34  
35  
36  
37  
38  
39  
40  
41  
42  
43  
44  
45  
46  
47  
48  
49  
50  
51  
52  
53  
54  
55  
56  
57  
58  
59  
60

## INTRODUCTION

Addictive behaviors are the major contributors to human morbidity and premature death; tobacco and alcohol use being the most prevalent addictive behaviors and cannabis the most prevalent “unsanctioned psychoactive drug” used worldwide (1). Adolescence is a particularly sensitive life stage where tobacco, alcohol and cannabis are used as a way to learn and take on roles. And, if tobacco, alcohol and cannabis consumption and their association with cancer risk, chronic disease and health conditions are clearly stated in the literature (2), we also know the importance of events occurring in the earliest stages of human development (before birth and during childhood) on further adult health conditions thanks to the life course approach (3). For example, because adolescence is a period during which the brain undergoes profound remodeling in areas, alcohol and cannabis consumption during this period can lead to impaired learning ability, memory and brain development and to difficulties in cognitive control and emotion regulation(4–6).

A major concern therefore is to develop alcohol, tobacco and cannabis prevention programs for youths that work on changing representations about those products and consumptions. These programs should be focused on helping life skills mobilization such as resistance and self-regulation for example.

Nowadays, there are many programs focused on addiction prevention implemented in schools. Unfortunately, among them, evidence-based and life skills programs are scarce (7,8). In France, since 2015, the organization ARIA (“Association Ressources et Initiatives Addictions”; association for initiatives and resources addictions), with a clinical psychologist and an addiction psychiatrist, have developed a program named *Expériences Animées* (animated experiences) inspired by life skills development programs that have proven to be successful such as the Life Skills Training program (9), the Unplugged program (10) and the In Media program (11).

The *Expériences Animées* (EA) program involves supervised animated short movies and talks with high school and secondary school pupils about the use of psychoactive substances and addictions. The priority is given to secondary schools in priority education areas and to vocational high schools.

The program draws on the recommendations given by Botvin and Griffin (12) and aims to:

- be draw on theoretical models and address various risk and protective factors;
- be suitable for the age group and sensitive to the changes adolescents go through;
- contain material to help adolescents recognize and resist peer pressure;
- promote the development of resistance skills;
- provide knowledge about levels of substance use to correct normative expectations;
- be based on interactive methods to stimulate participation and skills development;



- be culturally focused and contain audio-visual components and language familiar to the target group;
- be appropriately dosed;
- involve trained staff (enthusiasm, ability to adapt during implementation, etc.).

The EA program's overall purpose is to: delay initiation; prevent adolescents from becoming regular consumers; reduce the risks and harm relating to these consumptions; open the way for adapted support measures.

The EA program has never been evaluated and we are interested in understanding how, under what circumstances, through which mechanisms and among which adolescents it works. To answer these questions, we developed the ERIEAS study (“Evaluation Réaliste de l’Intervention Expériences Animées en milieu Scolaire”; Realist evaluation of the EA intervention in schools). Here, we present the ERIEAS study protocol based on a realist evaluation.

## STUDY OBJECTIVES AND LOCATION

Our study aims to evaluate the EA program in order to set out an intervention theory for the program. To do so, the study has 2 main objectives:

- First objective: to characterize the effects (Outcomes) on the pupils of secondary and high schools in terms of:
  - Tobacco, alcohol and cannabis use
  - Consulting of a healthcare professional for a problematic use of substances.
- Second objective: to characterize the context and underpinning mechanisms of action (Mechanisms and Context), in order to document the conditions of effectiveness of EA in terms of contextual conditions or mechanisms triggered by the program. In other terms, it is question of identifying the program's key functions - which may be contextual conditions or action mechanisms - related to:
  - The pupils' characteristics
  - The practitioners' characteristics
  - The design of the materials and in particular the techniques employed, their use during program sessions, the activities for teaching staff and parents.
  - The macro- (e.g. classes, schools, cities) and micro- (e.g. supervised short films and talks characteristics) intervention environment.

1  
2  
3 The second objective offers a way to identify the EA's key functions with a view to transferability (13,14)  
4 (transferring key features and adapting non-key aspects) and comparison of EA with others implemented or  
5 transferred programs as *Unplugged* (10).  
6  
7

8 The EA program takes place in the French department of Charente, in 10 schools (3 high schools and 7 secondary  
9 schools).  
10  
11

12 The ERIEAS study will take place in all the 10 schools involved in the EA program. It started in January 2019 and  
13 will last until December 2022. Participants' inclusion will start at the 30<sup>th</sup> September 2019.  
14  
15  
16

## 17 18 **METHODS AND ANALYSIS** 19

20 We reported this manuscript in line with the Rameses II reporting standards for realist intervention (cf. check-list  
21 in additional file) (13). ERIEAS seeks to evaluate the actual impact and the impact factors of the EA program  
22 using a realist evaluation. To this purpose, a multi-case approach will be adopted and based on the contribution  
23 analysis paradigm (14), the aim being to develop and adjust an intervention theory. The case-study method will be  
24 used as it involves exploring phenomena in context and analyzing their interactions with other elements that are  
25 meaningful to the research (15). The study comes under the theory-driven evaluation framework (16–19) where  
26 the realist evaluation method is used to explore the effects, mechanisms and the influence of context on the  
27 outcomes.  
28  
29  
30  
31  
32  
33  
34

35 The study also comes under natural experiments in intervention research. This is because the intervention is little  
36 standardized, not undertaken for the purposes of the research (20).  
37  
38  
39  
40

### 41 **Conceptual framework** 42 43

44 In realist evaluation, developed by Pawson et Tilley (21), intervention effectiveness depends on the underlying  
45 mechanisms at play within a given context. The evaluation is about identifying context- mechanism-outcome  
46 configurations (CMOs). The aim is to understand how and under what circumstances an intervention works. What  
47 is studied in this approach is the context with the intervention as a part of it. Realist evaluation seeks to understand  
48 how an intervention brings about change, considering context and target group, and grounding the evaluation on  
49 a middle-range theory (theory that aims to describe the interactions between outcomes, mechanisms and contexts)  
50 about the mutual influences of intervention and context (22,23). It comes under the black box paradigm (24) and  
51 differs from the experimental paradigm which evaluates effectiveness without looking at the mechanism by which  
52 an intervention works and the influence of the context. Realist evaluation asks the following question: did the  
53  
54  
55  
56  
57  
58  
59  
60

1  
2  
3 intervention work in a way consistent with its underpinning theory? It seeks to understand how the intervention  
4 works by focusing on the underlying mechanisms and the influence of context. The generative causality works on  
5 three assumptions (25): i) An intervention does not work in and of itself, and it is not what produces an outcome;  
6  
7 ii) All interventions trigger a mechanism or a set of mechanisms that produce an outcome; iii) All interventions  
8  
9 are delivered in a context.  
10  
11

12  
13 Hence, the evaluation is about identifying context-mechanism-outcome configurations (CMOs), called middle  
14 range theories (MRT). Hypothesizing and validating by empirical investigations, these CMO configurations  
15 (theory that aims to describe the interactions between outcomes, mechanisms and contexts) help to understand  
16 how an intervention brings about change, considering context and target group (22,23). The recurrence of CMOs  
17 is observed in successive case studies or in mixed protocols such as realist trials (23). Indeed, in order to consider  
18 context, realist evaluators observe in successive cases what Lawson (quoted in Pawson, 2006 (25)) calls demi-  
19 regularities of CMOs (i.e. regular although not necessarily permanent occurrences of an outcome when an  
20 intervention triggers one or more mechanisms in a given context) (23). According to realistic evaluators,  
21 specifically studying their recurrences in different contexts renders possible the isolation of key elements that are  
22 replicable in a family of contexts. This gives rise to middle-range theories that become stronger as progress is  
23 made through the cases. "These middle-range theories, in certain conditions, predict possible intervention  
24 outcomes in contexts different from the one in which the intervention was tested" (23).  
25  
26  
27  
28  
29  
30  
31  
32  
33  
34  
35  
36  
37  
38  
39  
40

#### 41 *Applied to our case*

42 The realist principle is suitable for studying non-linear interactions in complex systems. It is the reason why we  
43 decided to adopt this approach. The intervention under investigation applies to an operational program and it is  
44 therefore important to identify its key functions (26,27), that is to say its interventional or contextual components  
45 underpinning its effectiveness. This will allow us to hypothesize about 1) the program's effectiveness, 2) its added  
46 value compared to other existing programs and 3) its specificities. Ultimately, it should enable replication (28,29).  
47  
48  
49  
50  
51  
52  
53

54 For our purposes, here, each establishment involved in EA program with its own context will constitute a case.  
55 For each of the cases, the intervention will be studied to identify the mechanisms at play in the given context along  
56 with the variation in outcomes: the CMO configurations. CMO configurations will be identified through an  
57 analysis of each case as well as a cross-case analysis highlighting recurrent CMO configurations, thus identifying  
58  
59  
60

1  
2  
3 key features for possible replication. These will be fed into secondary theories (which may be tested again in other  
4 cases/contexts).

5  
6  
7 Drawing on the literature and on the experience of professionals delivering the intervention, we will first set out  
8 initial middle-range theories (21,25), that we will test in each case, by collecting data (qualitative and  
9 quantitative)(23).

10  
11  
12 The mechanisms will be identified qualitatively according to the definition by Ridde *et al.* "a mechanism is an  
13 element of reasoning and reaction of an agent with regard to an intervention productive of an outcome in a given  
14 context" (30,31). They will be divided into those relating to the session leaders and teachers in attendance and  
15 those relating to the pupils. For pupils, the literature allows us to already define two categories of mechanisms: 1)  
16 The representations about alcohol, tobacco and cannabis consumption; 2) The life skills developed/ mobilized.

17  
18  
19 Contextual elements will be included among all the elements collected qualitatively that satisfy the following  
20 definition: elements located in time and space that may affect the intervention and the outcomes produced, whether  
21 they relate to the session leaders, teachers, pupils, session delivery or the operational setting. In realistic approach,  
22 interventional elements are a part of context. So, we could distinct Ci (for Contextual factors linked to the  
23 Intervention) and Ce (for Contextual factors no linked to the intervention –External–). Each mechanism-context  
24 configuration may influence an outcome (O). In our study, outcomes are related to getting support from a health  
25 professional and using tobacco, alcohol, and/or cannabis.

26  
27  
28  
29  
30  
31  
32  
33  
34  
35  
36  
37 **Figure 1** synthesizes the principles of the realist evaluation.

38  
39  
40 **Figure 1: The realistic approach and the way to refine middle range theories applied to ERIEAS study.**

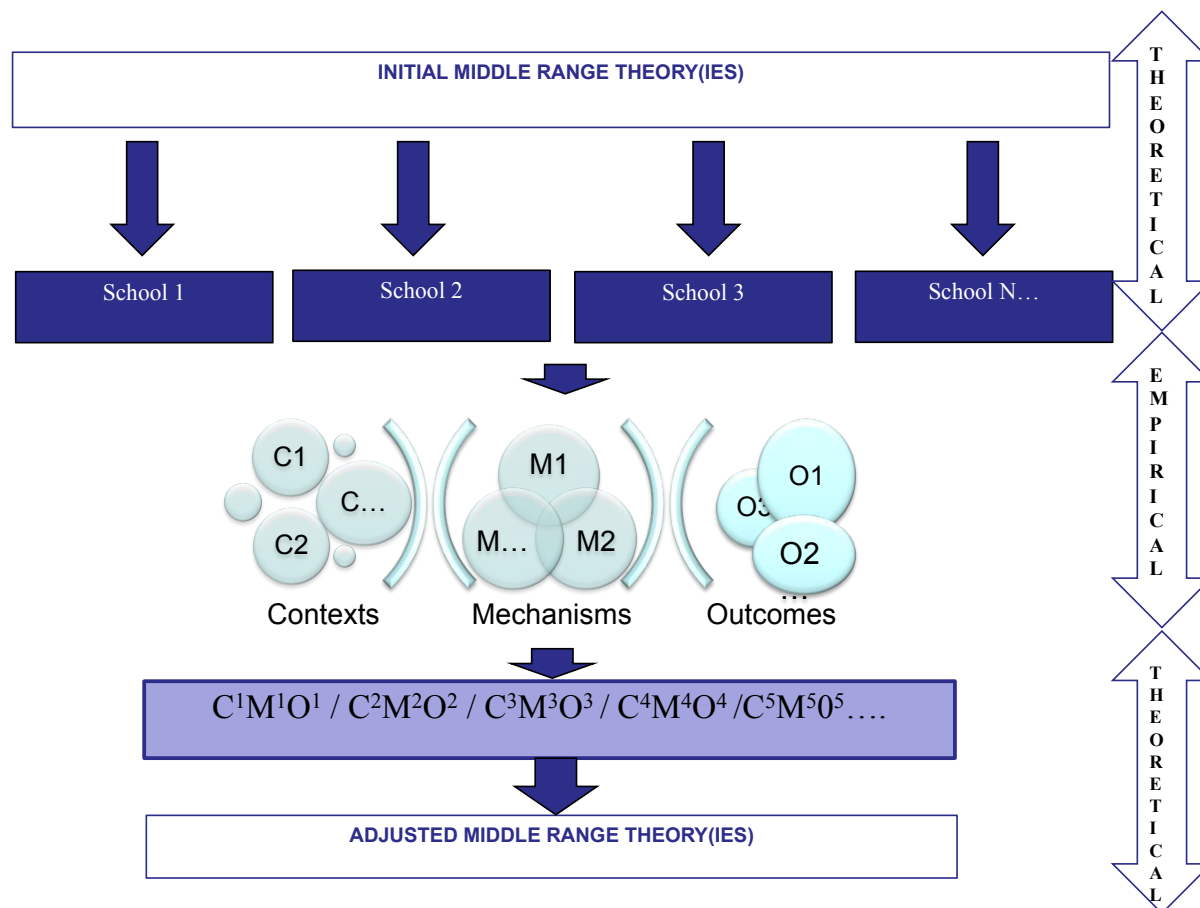

### The *Experiences animées* program

#### *The EA support: the short-animated movies*

The EA program involves supervised short-animated movies and talks with secondary school and high school pupils about the use of psychoactive substances and more generally about all kind of addictions. To reach its target audience, the EA program uses short animated films produced by student filmmakers (second-year students at the Angoulême filmmaking school). The films are made specifically for the program and every year, new students are selected to produce new short films.

Since 2015, every year, an 8-day filmmaking workshop for students (20-26 years old) is supervised by the EA program managers. During the workshop the students are tasked with "looking at the use of psychoactive substances, their functions, and sharing their thoughts about how people become addicted – what do you have to say about it? What would you like to convey to a young audience about this issue?". The program managers in no way intervene in the actual screenwriting and aesthetics. At the end of the workshop, the students show their proposals as filmed storyboards. Following the eight days during which students think about the issues of substance

1  
2  
3 use and in some cases reflect on their own experience, the program managers select several projects to be included  
4  
5 in *Expériences Animées*. Some 35 films have been produced since 2015.  
6  
7

### 8 ***Delivery of the sessions***

9

10 The intervention during the sessions comprises 4 phases

- 13 • Diagnosis: At the first session, pupils are asked to complete a short questionnaire about their  
14 representations, normative beliefs, knowledge and use of psychoactive substances. This will be used to  
15 adapt subsequent sessions.  
16  
17
- 18 • Instructions: At the beginning of each session, pupils are briefly reminded about the previous sessions:  
19 what they took away from them, what the session leaders noted and remarked. Pupils are then told that  
20 "We will watch several short films and then discuss the content together, sharing our thoughts and feelings  
21 about what we have seen".  
22  
23
- 24 • Interaction about the films: Several films are shown during each session which include reflective  
25 dialogue, sharing thoughts and experiences (experiential approach) with everyone able to contribute  
26 knowledge. Each session is adapted according to the initial self-questionnaire, the previous session and  
27 the delivery of the current session. After a film has been shown, pupils are encouraged to freely discuss  
28 the issues raised (reminders of prevention messages already dealt with, room for emotions, feelings,  
29 interpretations, differences in point of view, etc.). Thoughts, ideas and information are noted down and  
30 are put up in real time. Afterwards, pupils are given time for critical reflection, positioning, reformulation  
31 and summarizing.  
32  
33
- 34 • End of the session: At the end of a session, pupils go over the keywords from the session, they summarize  
35 what was said; together they construct a prevention message based on the films shown. Discussion times  
36 are necessary in order to adapt the subsequent sessions.  
37  
38  
39  
40  
41  
42  
43  
44  
45  
46  
47  
48  
49  
50  
51

52 The sessions are facilitated by two session leaders: a prevention officer from "Centres Jeunes Consommateurs"  
53 (centres for young substance users) and a psychologist. Their demeanor when delivering the sessions is important.  
54 They should act as clinicians who are there to listen, to help pupils reflect on the issues raised, to encourage them  
55 to express themselves while allowing others to do so, and to facilitate dialogue. A teacher, school nurse or other  
56 staff member from the school also attends the session. Each pupil is given an individual program booklet for  
57  
58  
59  
60

1  
2  
3 making notes and writing down any thoughts about what goes on during the sessions. Classroom tables are  
4 arranged in a U shape or in a rectangle (if there are many pupils in the class).  
5  
6  
7

8 In a given secondary/high school, one session per term is delivered for each class. In the ERIEAS study, three film  
9 showings (sessions) will therefore be scheduled:  
10  
11

- 12 • for each 7<sup>th</sup> grade (secondary school) and 10<sup>th</sup> grade (high school) of the schools for the 2019-2020  
13 academic year  
14
- 15 • for each 8<sup>th</sup> grade (secondary school) and 11<sup>th</sup> grade (high school) of the schools for the 2020-2021  
16 academic year  
17
- 18 • for each 9<sup>th</sup> grade (secondary school) and 12<sup>th</sup> grade (high school) of the schools for the 2021-2022  
19 academic year.  
20  
21  
22  
23  
24  
25  
26

### 27 **Study population**

28 Different groups will be followed in the ERIEAS study:  
29

- 30 • Pupils: The sample involved in the EA program will be studied. From the 2019-2020 academic year until  
31 the 2021-2022 academic year (3 academic years), the EA program will be delivered in 10 establishments  
32 (in total 39 classes and around 1000 pupils).  
33
- 34 • Education community members: one teacher whose class is involved in the sessions, the school nurse and  
35 the headmaster, i.e. a total of 3 people per establishment will be interviewed in the study.  
36
- 37 • Session leaders: 3 persons will be interviewed.  
38
- 39 • Funders: 3 funders will be interviewed.  
40  
41  
42  
43  
44  
45  
46

47 The inclusion criteria will be:

- 48 • For pupils: Pupils from the 10 secondary and high schools involved in EA program, in 7<sup>th</sup> grade and 10<sup>th</sup>  
49 grade in 2019/2020 academic year, not opposite to participate and whose holders of parental authority are  
50 not opposite to the participation of the child.  
51  
52
- 53 • For education community members, session leaders and funders: non-opposition to participate.  
54  
55  
56  
57

58 The only exclusion criteria will be to be under legal protection.  
59  
60

**Patient and Public Involvement**

The ERIEAS study does not include any patient or public involvement in terms of setting research priorities, defining research questions or outcome, providing input into study design, or disseminating the results. The research participants will be called on to answer questionnaires, or interviews.

**Study design**

According to theory-driven evaluation methodology (16–19), the study will be composed of 4 stages. **Figure 2** presents the 4 stages.

**Figure 2: Stages of the ERIEAS study**

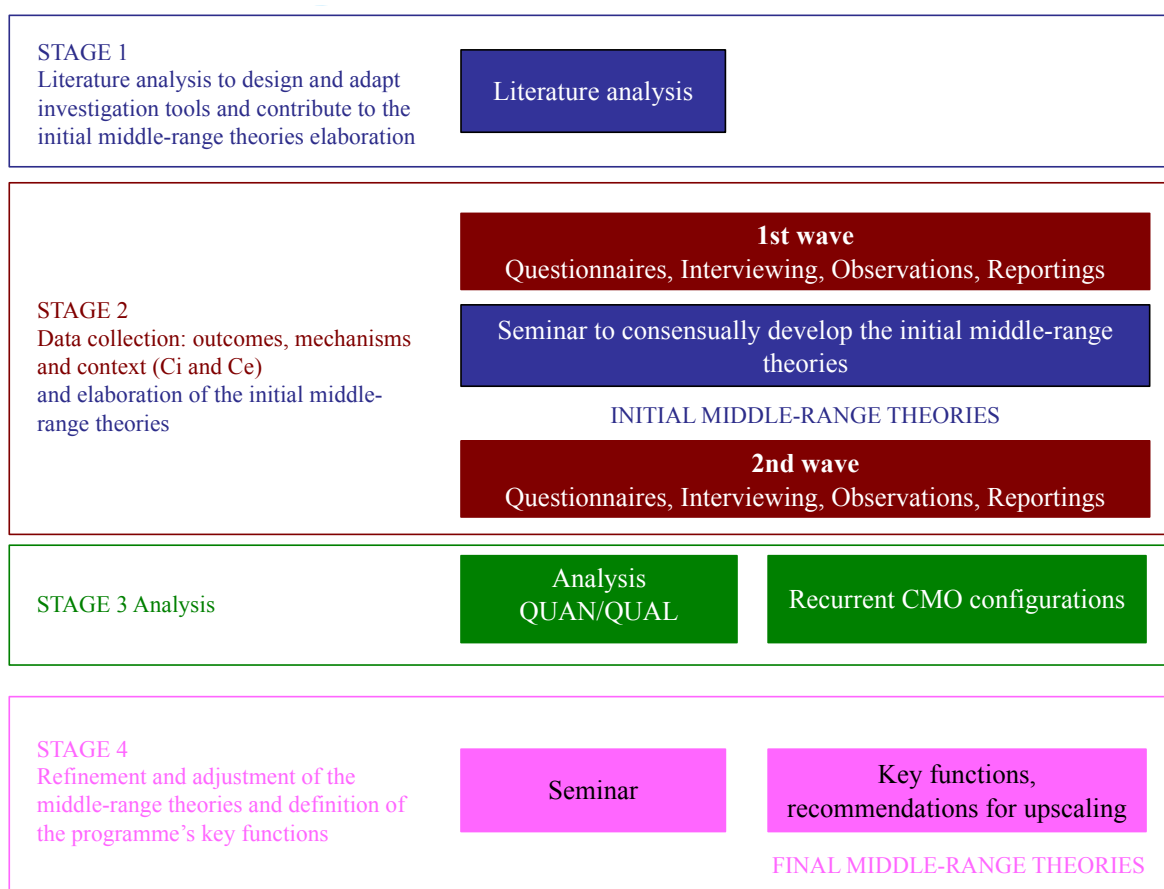

**Stage 1 – Literature analysis**

The first stage involves a literature analysis to design and adapt investigation tools and contribute to the initial middle-range theories elaboration (stage 2).

A scoping review has been conducted to identify strategies that are effective in school settings in helping pupils to change their representations of alcohol, cannabis and tobacco use and to develop or mobilize life skills to prevent



1  
2  
3 addictions. The data sources used were: PsycInfo, PsycArticles, Psychology and Behavioral Sciences Collection,  
4 SocIndex, Cairn and Web of Sciences.

5  
6  
7 The keywords were “life skills” and [“adolescents” or “young adults” or “teenagers”]. Inclusion criteria were:  
8  
9 English or French language publications from 2014 to 2019; original or methodological articles focusing on the  
10  
11 evaluation or exploration of intervention techniques applied to school settings; interventions aimed at changing  
12  
13 representations, life skills as a way of delaying experimentation with alcohol, tobacco and cannabis and, reducing  
14  
15 its use.

16  
17 We conducted a double-blind review of the selected papers and extracted information regarding the intervention  
18  
19 (name, location, population, design), the evaluation design (method, main and second outcomes), the result of the  
20  
21 intervention, its key functions and context of implementation. The purpose of this review was to extract  
22  
23 information about the contexts, mechanisms and outcomes our study has to focus on. Our analysis questions were:  
24  
25 what are the most effective intervention techniques? What representations and skills are they effective for? What  
26  
27 contextual conditions influence the effectiveness of the techniques? The results have been used to design and adapt  
28  
29 our tools (questionnaire, interview and observation grids, scorecard) and will be used for the initial middle-range  
30  
31 theories development (stage 2). Scoping review results will be presented in a dedicated paper.

### 32 33 34 ***Stage 2 – Data collection and elaboration of the initial middle-range theories***

35  
36  
37 Stage 2 involves data collection to appraise the outcomes, mechanisms and contextual elements (including the  
38  
39 techniques). First wave of data collection will help to elaborate initial middle-range theories (to establish how the  
40  
41 intervention works in context) together with literature analysis results from stage 1. Second wave of data collection  
42  
43 will contribute to verify the initial theories (contribution analysis). In annex, in **table 1**, we exposed the variables  
44  
45 that we will collect and the way of collection.

46  
47 To collect data, the following tools will be used:

- 48  
49 • A questionnaire to collect mechanisms and outcomes on pupils at T0 (1<sup>st</sup> wave) and T1 (2<sup>nd</sup> wave)

50  
51  
52 It will contain: descriptive variables (gender, age, socio-professional category of parents); questions on tobacco,  
53  
54 alcohol and cannabis use; a question relating to the "use of support services" variable; questions related to the  
55  
56 knowledge and perception of tobacco, cannabis and alcohol use; scales assessing peer pressure and life skills.  
57  
58  
59  
60

1  
2  
3 This questionnaire will be administrated at T0 (i.e. at the end of September/ beginning of October 2019) and T1  
4 (June 2022) to all the pupils participating to the ERIEAS study. **Table 2** in annex, lists the questions/scales and  
5 their previous use in other studies.  
6  
7

- 8 • Pupils interviews:

- 9
  - 10 ○ Non-directive interviews to collect contextual factors, mechanisms and outcomes on pupils (IP1)

11 In the first academic year, two pupils per class will be randomly selected and interviewed, until saturation (i.e. the  
12 moment when the collected data does not add anything new to the understanding of the research topic), meaning  
13 at least 80 pupils will be monitored.  
14  
15

16 This first session of non-directive interviews will be held in November/ December 2019. These interviews will  
17 help to elaborate the initial middle range theories, to elaborate the second wave of interviews with pupils (IP2) and  
18 to configure and design a questionnaire including a DCE (Discrete Choice Experiment) set of questions.  
19  
20

- 21
  - 22 ○ Semi-directive interviews to validate CMO configurations on pupils (IP2)

23 At the end of the second academic year (June 2021), a second session of semi-directive interviews with pupils will  
24 be held (randomly selected and different from the previous session). This qualitative material will validate or not  
25 the framework expressed through the initial middle-range theory (CMO configurations). For each hypothesized  
26 configuration in the initial middle-range theories, there will be an open-ended question that will not allow the  
27 respondent to be guided by the expected answer (presence or not of C and M, or combinations thereof).  
28  
29

30 A total of 160 interviews of pupils will therefore be conducted during the study in two sessions.  
31  
32

- 33 • Semi-directive interviews to collect mechanisms and contextual factors on school professionals and EA  
34 session leaders (IE1 and IE2).  
35

36 Semi-structured interviews with the education community and the session leaders will collect information related  
37 to context parameters (including Ci) and professionals' mechanisms. Three session leaders and 3 people per  
38 establishment will be surveyed: the nurse, the headmaster, a teacher whose class is involved in the intervention.  
39  
40

41 Interviews will be held twice: at the end of the first academic year (June 2020) and at the end of the 3-year  
42 intervention period (June 2022). A total of 3 session leaders and 30 professionals will therefore be interviewed  
43 twice. In total, 66 interviews will be realized.  
44  
45

46 This first session of semi-directive interviews will help to elaborate the initial middle range theories, to elaborate  
47 the second wave of interviews (IE2) and to configure and design the DCE questionnaire. The second session of  
48 semi-directive interviews will validate or not the framework expressed through the initial middle-range theory.  
49  
50  
51  
52  
53  
54  
55  
56  
57  
58  
59  
60

- Semi-directive interviews to collect contextual factors on funders of the program (IF).

Semi-structured interviews with funders of the program will collect information relating to context parameters (Ce exclusively). A total of 3 funders will be interviewed once, in October 2019. These interviews will help to will help to elaborate the initial middle range theories.

- Observations to collect contextual elements of sessions notably.

The objective is to collect the following contextual elements, specific to each establishment: The intervention climate within the establishment and in each class, the reception given by the school staff as a whole, the conditions of session delivery, the motivation levels of the session leaders and teachers in attendance, the characterization of the feedback and sharing sequences (spatial organization, relations between pupils/session leaders/others).

Observations of at least 2 sessions per establishment will be conducted each academic year. 20 sessions per year will therefore be observed, making a total of 60 observations over the 3-year intervention period. Furthermore, the session leaders of non-observed sessions will produce a report following a reporting grid.

Before the program starts (in mid-October 2019), each program presentation for the school staff will be observed, thus adding 10 observation sessions. A total of 70 observation sessions will therefore take place.

- A scorecard to collect establishments characteristics (contextual elements - Ce)

Data relating to the characteristics of the establishments will be collected from the education authorities using a scorecard. These data will be : the level of urbanization of the town or city where the establishment is located (urban, quasi-urban, quasi-rural, rural), the deprivation index of the school area (FDep index from Rey et al., 2009 (32)), the number of pupils, male/female ratio, number of repeaters per establishment, the availability rate of the nurse, the type of establishment (general/vocational, priority education areas), the proximity to a center for young substance users and availability rate where appropriate, the occurrence of occasional awareness campaigns on addiction in the establishment and the fact of having been previously involved in *Expériences Animées*.

- A DCE questionnaire to validate CMO configurations and including an adaptation of discrete choice experiment (DCE).

This questionnaire will have variables based on a stated-preference method (33), named DCE (34). It will enable to better understand the pathway and the circumstances and determinants combinations that could be trigger to

initiate or maintain or re-engage a consumption of alcohol, tobacco and / or cannabis, using. It will help to validate or not the final middle range theories.

Figure 3 presents the different modalities of data collection.

Figure 4 presents the data collection timelines.

Survey instruments – questionnaires, interview guides, observation logs, and observations check lists– have been designed in line with literature analysis results (stage 1) and will be pre-tested.

Figure 3: Different modalities of data collection and their links with the middle-range theories

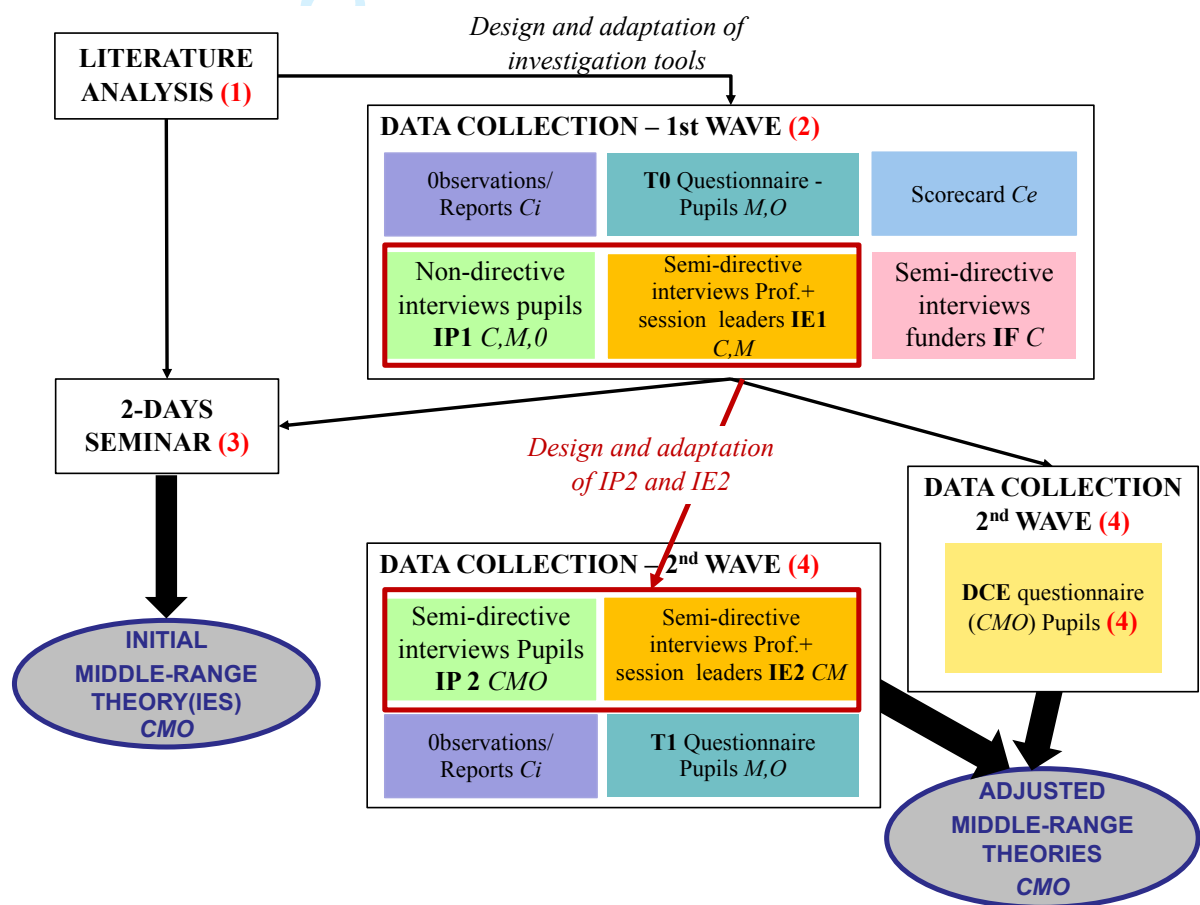

C, Context ; M, Mechanism ; O, Outcome; CMO, CMO configurations

Figure 4: Timeline of the data collection

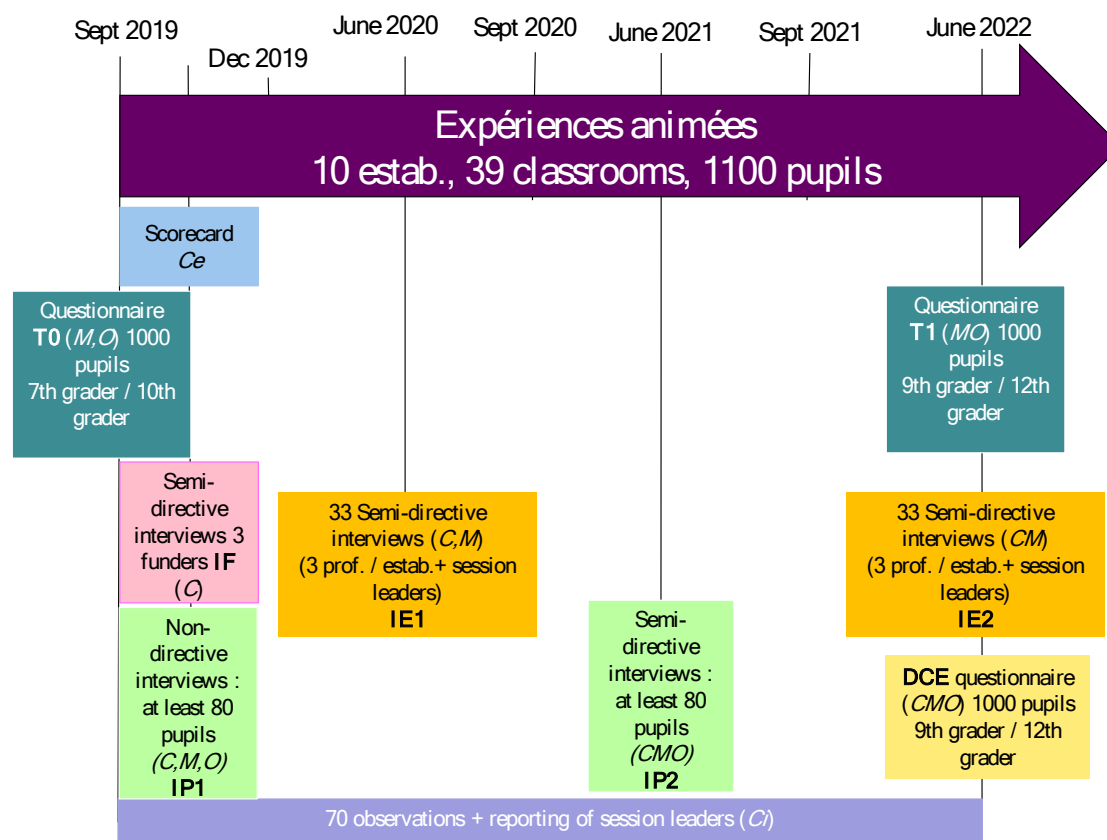

Thanks to quantitative and qualitative analyses, the following outcomes will be identified:

- Tobacco, alcohol and cannabis use (Current frequency of tobacco, alcohol and cannabis consumption (every day/week/month, rarely, never); number of episodes of heavy drinking (at least 5 drinks per occasion) in the last 7 days/30 days/12 months; number of drunkenness episodes in the last 7 days/ 30 days/ 12 months)
- Consultation of a healthcare professional to discuss about a problematic use of alcohol and/or tobacco and/or cannabis (number of times in the last 12 months)

1  
2  
3 At this stage, the literature review conducted helped to identify some of the mechanisms and contextual elements.  
4 They need to be confirmed during the second stage (i.e. seminar and elaboration of the initial middle-range  
5 theories). We present here the potential M and C we aim to investigate:  
6  
7

- 8 • In terms of representations and attitudes (35): normative expectations or perceived norms about the use,  
9 intentions, refusal and resistance skills, risk-related attitudes and behaviors, positive and negative beliefs  
10 about consequences, reasons to use, and perceived peers' influence and friends' use.  
11  
12
- 13 • In terms of life skills: the aptitude to mobilize self-management skills (self-esteem, problem-solving  
14 abilities, reducing stress and anxiety), general social skills (overcoming shyness, communicating clearly,  
15 building relationships), and drug resistance skills (defenses against pressures to use alcohol and other  
16 drugs, identify the consequences of substance use, risk-taking, and the influences of the media).  
17  
18  
19  
20  
21  
22  
23

24 The **table 1** gives details on the expected contexts and mechanisms and the time and modalities of collection.  
25  
26  
27

### 28 ***Stage 3 - Data analysis***

29  
30  
31 Data analysis will include analysis of each case (each school) and a cross-case analysis combining a QUAN/QUAL  
32 design (36) (i.e. to use quantitative and qualitative approaches in tandem and to embed one in the other to provide  
33 new insights or more refined thinking). The analysis will have to answer this question: In what contextual  
34 conditions and through which mechanisms does the program *Expériences Animées* produce outcomes? The  
35 validation of initial middle-range theories (CMOs) will allow us to answer it. This validation will go through by  
36 combining and comparing data from quantitative and qualitative analyses in monographs (an analysis of each case  
37 (establishment)) and by cross-case analysis. This analysis will identify the recurrent CMOs which will therefore  
38 be replicable.  
39  
40  
41  
42  
43  
44  
45  
46  
47

#### 48 *Quantitative data (from T0 and T1 questionnaires) – Analyses of the evolution of Mechanisms and Outcomes*

49  
50 A first descriptive analysis will be conducted on the representations, mobilization of life skills, tobacco, alcohol  
51 and cannabis use and the use of support services at each measuring point. Trajectory modeling will be undertaken  
52 using latent class growth modeling in order to study changes in representations, life skills, products use and use of  
53 support services between the two questionnaires. The analysis will be adjusted according to the pupils'  
54 characteristics (age, gender, socio-professional category of parents) and to the establishments (level of  
55 urbanization, index of social disadvantage, number of pupils, male/female ratio, number of repeaters per  
56  
57  
58  
59  
60

1  
2  
3 establishment, proximity to a center for young substance users/nurse, earlier involvement in *Expériences Animées*,  
4 involvement in occasional awareness campaigns on addiction, type of establishment).  
5  
6  
7

8 This analysis will enable to verify the program's impact in context across all the pupils by studying the changes  
9 between the two collection times. As some of the variables used here are the same as for the LST (37) and  
10 Unplugged (10) programs, the findings will be compared and contrasted with those of both programs conducted  
11 in Nouvelle-Aquitaine region.  
12  
13  
14

### 15 16 17 *Qualitative data*

18 The qualitative data can be divided in two groups (the two waves), with different use and aim. The firsts interview  
19 sessions and observations (i.e. IP1, IF, IE1, scorecard and firsts observations) will be mobilized to set the frame  
20 of the initial middle range theories. Following this first set of qualitative investigations, a 2-day seminar will be  
21 organized to set out the initial middle-range theories. The aim of this seminar will be to discuss the findings of the  
22 literature review and the first wave of data collection. This seminar will be interdisciplinary: epidemiologists,  
23 prevention experts, addiction, experts, psychiatrists, psychologists, sociologists, EA session leaders and ARIA  
24 staff will be present. Drawing on the participants' experiences, the literature review, the observations and the  
25 interviews, the seminar will enable to set out hypothesis about the mechanisms (M) linking Ci and Ce to the O.  
26  
27  
28

29 The second set of qualitative investigations (i.e. IP2, IE2+lasts observations) will be mobilized to validate the  
30 final middle range theories.  
31  
32  
33

34 All the qualitative data (i.e. data collected from pupils, funders, professionals' interviews and observations) will  
35 be analyzed by content analysis (38) which refers to "a set of techniques for systematically and objectively  
36 analyzing and describing the content of communication. The aim is to obtain indicators allowing inferences to be  
37 made about the messages and how they are produced and received (inferred variables)". Content analysis encodes,  
38 classifies and ranks the communication in order to examine its patterns, trends or distinguishing features, in our  
39 case the recurrence of C-M-O configurations in each case (establishment) and by a cross-case analysis.  
40  
41  
42  
43  
44  
45  
46  
47  
48  
49  
50  
51  
52

### 53 *Quantitative data from DCE- questionnaire – Analyses of DCE questionnaire*

54 A DCE will be used in order to i) understand combinations of circumstances and determinants that impact on the  
55 decision of teenagers to start substances uses and/or prevent them from cessation and/or lead them to relapse if  
56 concerned, ii) validate CMO configurations.  
57  
58  
59  
60

1  
2  
3 The DCE will allow quantifying the weights individuals attach to various attributes of a situation in order to finally  
4 predict their independent impact on decisions. In other terms, the DCE approach will allow an analysis of  
5 individual stated preferences in response to hypothetical choices and enables the estimation of the relative  
6 importance of each level of attributes during the decision-making process. When presented with hypothetical  
7 options (i.e. choice scenarios) that describe alternative specifications of a situation, respondents are assumed to  
8 choose the behavior they would have. The higher a respondent's preference for certain attribute levels, the more  
9 likely they are to choose that scenario over any alternative. This method will allow the searcher to highlight  
10 situations and configurations allowing to mobilize or not life skills. Mixed logit models will be used to establish  
11 whether or not the attributes' levels presented in the scenarios are statistically significant predictors of adolescents'  
12 choices.

#### 23 24 *Combination of quantitative and qualitative data*

25  
26 The ERIEAS study will therefore combine quantitative and qualitative methods, mobilizing a mixed methods  
27 research. This study has a multiphase design with a first data collection combining QUAN (T0) + QUAL (i.e. IP1,  
28 IF, IE1, scorecard and firsts observations). These first data will help and guide a second qualitative phase (i.e. IP2,  
29 IE2) and the DCE questionnaire elaboration. This design seemed to be particularly relevant as it allows flexibility  
30 to address a set of research questions that will arise from each other.

31  
32 The CMO configurations obtained from the qualitative data will be compared with those obtained from the DCE  
33 questionnaire. All these CMO configurations will be discussed during 1-day seminar in stage 4. Therefore, it will  
34 lead to a very complete thorough analysis of the EA complex intervention.

#### 35 36 37 38 39 40 41 42 43 ***Stage 4 - Refinement and adjustment of the middle-range theories, and definition of the program's key functions***

44  
45 The different modalities of investigation and analyses will lead us to refine progressively our middle range  
46 theories. We will compare the primary theories with the CMO configurations observed in each establishment and  
47 the recurrent CMOs in order to consolidate and adjust the initial middle range theories. Furthermore, the DCE  
48 questionnaire will allow the research team to formulate strong hypotheses about the triggers to initiate or maintain  
49 or re-engage a consumption of alcohol, tobacco and / or cannabis, using among adolescents and the impact of the  
50 *Experiences Animées* intervention.



1  
2  
3 The material will be synthesized and used to refine and adjust the final middle range theories and the program's  
4 key functions. This work will be conducted during a second seminar (1 day) with the whole project team: the  
5 researchers, *Experiences Animées* professionals and ARIA staff members.  
6  
7  
8  
9

10 The team will carry out the following:

- 11 • a definition of the *Experiences Animées* program's key functions (configurations underpinning the  
12 program's success)
- 13 • a comparison with the elements used in other addiction prevention programs designed to develop life  
14 skills, such as the LST program (37) and Unplugged (10)
- 15 • an exploration into further strategies to complete *Experiences Animées* wherever this is necessary for  
16 ensuring optimal outcomes
- 17 • the drafting of detailed recommendations 1) to scale-up the *Experiences Animées* program's key functions  
18 to other areas with other stakeholders, and 2) for a quasi-experimental large-scale evaluation of the  
19 program (where only the key functions will be retained and freely adapted) if required (judgement criteria  
20 may not be precisely determined at this stage).  
21  
22  
23  
24  
25  
26  
27  
28  
29  
30  
31  
32  
33

## 34 ETHICS AND DISSEMINATION

35  
36  
37 This article describes a protocol using a realist design to understand how an innovative prevention program works  
38 and, what contexts, mechanisms, and outcomes are at stake in this intervention. Realist evaluation is a valuable  
39 design allowing to highlight the triggers of an intervention and guiding its transferability.  
40  
41  
42  
43

44 The project will be carried out with full respect of current relevant legislation (e.g. the Charter of Fundamental  
45 Rights of the EU) and international conventions (e.g. Helsinki Declaration). It follows the relevant French  
46 legislation of the research category on interventional research protocol involving the human person (Jardé law,  
47 category 3 research on prospective data). The methods development, data collection and analysis will take account  
48 the following issues:  
49  
50  
51  
52  
53

- 54 • Anonymity of study respondents will be preserved and ensured at all times as respondent(s) request.  
55 Unnecessary collection of personal data will be avoided, and respondents will have the right to review  
56 outputs and withdraw consent. All personal data will be coded, removed from the data for analysis and  
57  
58  
59  
60

1  
2  
3 stored separately. Only designated research staff will have access to the keys linking the data with the  
4  
5 personal information.

- 6  
7 • Information regarding the study and the right to refuse to participate will be distributed to all study  
8  
9 participants and their parents or parental authority's holders, and in the case of refusal, alternative means  
10  
11 of data collection will be explored (e.g. alternative respondents).

12  
13  
14 The protocol was approved by the Comité et Protection des Personnes (CPP) i.e. Committee for the  
15  
16 Protection of Persons CPP SUD-EST VI n°: AU 1525 and was reported to the Agence Française de  
17  
18 Sécurité Sanitaire des Produits de Santé (ANSM) i.e. the French National Agency for the Safety of  
19  
20 Health Products. It is in conformity with reference methodology MR003 of Bordeaux University Hospital  
21  
22 (CNIL n° 2026779v0).

23  
24  
25 This research has been registered on the site <http://clinicaltrials.gov/>.

26  
27  
28 The research project is registered in the European database ID-RCB under no 2019-A01003-54.

29  
30  
31 From a research point of view, the methodology we propose is consistent with the « bottom-up » approaches  
32  
33 advocated in health promotion. Since this approach allows to better reflect stakeholders' views and concerns, and  
34  
35 makes external validity workable, it becomes therefore a preferable alternative for evaluation of health promotion  
36  
37 or programs (39). Our study is a realist evaluation based on a natural experiment mobilizing mixed-models  
38  
39 methods and a preference stated method. Therefore, it is an innovative way of studying process of a complex  
40  
41 intervention (40). Due to its specific methodology and its large sample, this study will provide strong and detailed  
42  
43 information regarding the young people's consumption of tobacco, alcohol and cannabis and their representations  
44  
45 of these consumptions. Focusing on the stated preference methods this study will highlight how pupils mobilize  
46  
47 competences and life skills towards addictive products.

48  
49  
50  
51 Tobacco, alcohol and cannabis consumption among adolescents are worrying, especially in France (41–44) and,  
52  
53 prevention interventions should be tailored to this specific population. This study will explain and pinpoint the  
54  
55 precise impact of the *Expériences Animées* program and the conditions for this impact. It will allow to define the  
56  
57 EA program's key functions and how they work in different contexts or how they could be adapted in form; to  
58  
59 compare and contrast the program with other programs being implemented in France, then offering fine tweaking  
60

1  
2  
3 solutions for optimal outcomes; to define a guideline to implement *Experiences animées* elsewhere. As such, the  
4  
5 conclusions will be highly replicable and offer a basis for designing other interventions using identified key  
6  
7 functions. We will publish different papers in order to first describe the addictive behaviors of this population,  
8  
9 then to analyze the impact and key functions of the EA program and eventually we will focus on what triggers the  
10  
11 consumption of young people exposed to a prevention program. Finally, a report on the study will offer to health  
12  
13 authorities evidence-based results to help with health promotion politics roll-out in schools. To conclude, this  
14  
15 project will be of great interest to policy-makers, authorities and field professionals involved in the prevention and  
16  
17 health promotion sector.  
18  
19  
20  
21  
22  
23  
24  
25  
26  
27  
28  
29  
30  
31  
32  
33  
34  
35  
36  
37  
38  
39  
40  
41  
42  
43  
44  
45  
46  
47  
48  
49  
50  
51  
52  
53  
54  
55  
56  
57  
58  
59  
60

## REFERENCES

1. Gowing LR, Ali RL, Allsop S, Marsden J, Turf EE, West R, et al. Global statistics on addictive behaviours: 2014 status report. *Addiction*. 2015;110(6):904–19.
2. Brick J. *Handbook of the Medical Consequences of Alcohol and Drug Abuse*. 2nd edition. New-York: John Brick; 2012. (The Haworth Press, Taylor and Francis Group).
3. Barker D. *Mothers, Babies, and Disease in Later Life*. 2nd ed. London, UK: BMJ Publishing Group; 1998. 192 p.
4. Schmits E, Mathys C, Quertemont E. A longitudinal study of cannabis use initiation among high school students: Effects of social anxiety, expectancies, peers and alcohol. *Journal of Adolescence*. 2015 Jun 1;41:43–52.
5. Meruelo AD, Castro N, Cota CI, Tapert SF. Cannabis and alcohol use, and the developing brain. *Behavioural Brain Research*. 2017 May 15;325:44–50.
6. Lorenzetti V, Alonso-Lana S, Youssef GJ, Verdejo-Garcia A, Suo C, Cousijn J, et al. Adolescent Cannabis Use: What is the Evidence for Functional Brain Alteration? *Curr Pharm Des*. 2016;22(42):6353–65.
7. Stockings E, Hall WD, Lynskey M, Morley KI, Reavley N, Strang J, et al. Prevention, early intervention, harm reduction, and treatment of substance use in young people. *The Lancet Psychiatry*. 2016 Mar;3(3):280–96.
8. Faggiano F, Vigna-Taglianti FD, Versino E, Zambon A, Borraccino A, Lemma P. School-based prevention for illicit drugs use: A systematic review. *Preventive Medicine*. 2008 May 1;46(5):385–96.
9. Botvin GJ, Griffin KW. Life skills training as a primary prevention approach for adolescent drug abuse and other problem behaviors. *Int J Emerg Ment Health*. 2002;4(1):41–7.
10. Vadrucci S, Vigna-Taglianti FD, van der Kreeft P, Vassara M, Scatigna M, Faggiano F, et al. The theoretical model of the school-based prevention programme Unplugged. *Glob Health Promot*. 2016 Dec;23(4):49–58.
11. Groupement Romand d'Etudes des Addictions. Programme In Media [Internet]. 2018 [cited 2018 Jul 16]. Available from: <https://www.grea.ch/evenements/in-medias-animer-un-atelier-de-dialogue-philosophique-2014-03-04>
12. Botvin GJ, Griffin KW. Life skills training: Empirical findings and future directions. *Journal of primary prevention*. 2004;25(2):211–232.
13. Wong G, Westhorp G, Manzano A, Greenhalgh J, Jagosh J, Greenhalgh T. RAMESES II reporting standards for realist evaluations. *BMC Medicine*. 2016 Jun 24;14(1):96.
14. Mayne J. Addressing Attribution through Contribution Analysis: Using Performance Measures Sensibly | Better Evaluation. *The Canadian Journal of Program Evaluation*. 2001;1–24.
15. Yin RK. *Case Study Research: Design and Methods*. 5th Revised edition. Thousand Oaks, CA: SAGE Publications Inc; 2014. 282 p.
16. Chen H-T. *Theory-driven evaluations*. Newbury Park, CA: Sage Publications; 1990. 326 p.
17. Stame N. Theory-Based Evaluation and Types of Complexity. *Evaluation*. 2004 Jan 1;10(1):58–76.
18. Weiss C. How Can Theory-Based Evaluation Make Greater Headway? *Eval Rev*. août 1997;21(4):501-24.
19. De Silva MJ, Breuer E, Lee L, Asher L, Chowdhary N, Lund C, et al. Theory of Change: a theory-driven approach to enhance the Medical Research Council's framework for complex interventions. *Trials*. 2014 Jul 5;15:267.
20. Craig P, Cooper C, Gunnell D, Haw S, Lawson K, Macintyre S, et al. Using natural experiments to evaluate population health interventions: new MRC guidance. *J Epidemiol Community Health*. 2012 Dec;66(12):1182–6.
21. Pawson R, Tilley N. *Realistic Evaluation*. SAGE Publications; 1997. 260 p.
22. Pawson R, Greenhalgh T, Harvey G, Walshe K. Realist review--a new method of systematic review designed for complex policy interventions. *J Health Serv Res Policy*. 2005 Jul;10 Suppl 1:21–34.
23. Blaise P, Marchal B, Lefèvre P, Kegels G. Au-delà des méthodes expérimentales: l'approche réaliste en évaluation. 2010 [cited 2019 Jan 23]; Available from: <http://dSPACE.itg.be/handle/10390/6932>
24. Salter KL, Kothari A. Using realist evaluation to open the black box of knowledge translation: a state-of-the-art review. *Implement Sci*. 2014 Sep 5;9:115.
25. Pawson R. *Evidence Based Policy: A Realist Perspective*. SAGE Publications Ltd. 2006.
26. Hawe P, Shiell A, Riley T. Complex interventions: how “out of control” can a randomised controlled trial be? *BMJ*. 2004 Jun 26;328(7455):1561–3.
27. Hawe P, Shiell A, Riley T. Theorising Interventions as Events in Systems. *Am J Community Psychol*. 2009 Jun 1;43(3):267–76.
28. Cambon L, Minary L, Ridde V, Alla F. Transferability of interventions in health education: a review. *BMC Public Health*. 2012 Jul 2;12:497.

- 1  
2  
3 29. Cambon L, Minary L, Ridde V, Alla F. A tool to analyze the transferability of health promotion  
4 interventions. *BMC Public Health*. 2013 Dec 16;13:1184.
- 5 30. Ridde V, Robert E, Guichard A, Blaise P. L'approche réaliste à l'épreuve du réel de l'évaluation des  
6 programmes. *The Canadian Journal of Program Evaluation*. 2011;26(3):37.
- 7 31. Lacouture A, Breton E, Guichard A, Ridde V. The concept of mechanism from a realist approach: a  
8 scoping review to facilitate its operationalization in public health program evaluation. *Implementation Science*.  
9 2015 Oct 30;10(1):153.
- 10 32. Rey G, Jouglu E, Fouillet A, Hémon D. Ecological association between a deprivation index and  
11 mortality in France over the period 1997 - 2001: variations with spatial scale, degree of urbanicity, age, gender  
12 and cause of death. *BMC Public Health*. 2009 Jan 22;9:33.
- 13 33. Ryan M, Bate A, Eastmond CJ, Ludbrook A. Use of discrete choice experiments to elicit preferences.  
14 *BMJ Quality & Safety*. 2001 Sep 1;10(suppl 1):i55-60.
- 15 34. Mandeville KL, Lagarde M, Hanson K. The use of discrete choice experiments to inform health  
16 workforce policy: a systematic review. *BMC Health Serv Res*. 2014 Sep 1;14:367.
- 17 35. Giannotta F, Vigna-Taglianti F, Rosaria Galanti M, Scatigna M, Faggiano F. Short-term mediating  
18 factors of a school-based intervention to prevent youth substance use in Europe. *J Adolesc Health*. 2014  
19 May;54(5):565-73.
- 20 36. Creswell J, Graham W. *Designing and Conducting Mixed Methods Research*. SAGE Publication. 2011.
- 21 37. Velasco V, Griffin KW, Botvin GJ, Corrado Celata and Gruppo LST Lombardia. Preventing  
22 Adolescent Substance Use Through an Evidence-Based Program: Effects of the Italian Adaptation of Life Skills  
23 Training. *Prev Sci*. 2017 May;18(4):394-405.
- 24 38. Bardin L. *L'analyse de contenu*. 2nd edition. Paris: PUF; 2013. [Internet]. 2018 [cited 2018 Sep 9].  
25 Available from: [https://www.puf.com/content/L\\_analyse\\_de\\_contenu](https://www.puf.com/content/L_analyse_de_contenu)
- 26 39. Chen HT. The bottom-up approach to integrative validity: a new perspective for program evaluation.  
27 *Eval Program Plann*. 2010 Aug;33(3):205-14.
- 28 40. Moore GF, Audrey S, Barker M, Bond L, Bonell C, Hardeman W, et al. Process evaluation of complex  
29 interventions: Medical Research Council guidance. *BMJ*. 2015 Mar 19;350:h1258.
- 30 41. Le Nézet O, Janssen E, Brissot A, Philippon A, Shah J, Chyderiotis S, et al. Les comportements  
31 tabagiques à la fin de l'adolescence. *Enquête Escapad 2017*. *Bull Epidemiol Hebd*. 2018;274-82.
- 32 42. OFDT. *Drogues et addictions, données essentielles 2019*, Paris, OFDT, 2019, 200 p. Paris; 2019 p. 200  
33 p. (OFDT).
- 34 43. EMCDDA. *European Drug Report 2019: Trends and Developments*. Lisbon; 2019 Jun.
- 35 44. OFDT. *Usages d'alcool, de tabac et de cannabis chez les adolescents du secondaire en 2018*. OFDT;  
36 2019 Jun p. 4 p. Report No.: Tendances n° 132.
- 37  
38  
39  
40  
41  
42  
43  
44  
45  
46  
47  
48  
49  
50  
51  
52  
53  
54  
55  
56  
57  
58  
59  
60

1  
2  
3 **Data statement**  
4

5 Not applicable  
6  
7  
8  
9

10 **Authors' contribution**  
11

12  
13 JMF and AA drafted this article and all authors revised the manuscript. The project design was developed by LC.  
14  
15 JMF, AA, EM, RG, MT, LM, LM, VD and FA were involved in implementing the project and in developing the  
16  
17 evaluation design, under the supervision of LC. All authors read and approved the final manuscript.  
18  
19

20 **Acknowledgements**  
21

22  
23 The authors are very grateful to all those who took part in the project.  
24  
25

26 **Funding statement**  
27

28  
29 This research has received funding from a national recognized research agency; the INCa. This funding has been  
30  
31 obtained *via* a national competitive peer review grant application process, named “2018 Call for projects-  
32  
33 *Population health intervention research: Addressing all dimensions of cancer control*” (No. CAMBON-2019-  
34  
35 008).  
36  
37

38 **Competing interests**  
39

40 The authors declare that they have no competing interests.  
41  
42  
43  
44  
45  
46

47 **LIST OF ABBREVIATIONS**  
48

49 ANSM: “Agence Française de Sécurité Sanitaire des Produits de Santé”; the French National Agency for the  
50  
51 Safety of Health Products

52 ARIA: “Association Ressources et Initiatives Addictions”; Association for initiatives and resources addictions

53  
54 Ce : Contextual factor not linked to the intervention

55  
56 Ci : Contextual factor linked to the intervention

57  
58 CMO: Context – Mechanism – Outcomes

59  
60 CPP: “Comité de Protection des Personnes”; Committee for the Protection of Person

1  
2  
3 DCE : Discrete choice experiment  
4

5 EA: “Expériences Animées”; animated experiences  
6

7 ERIEAS: “Evaluation Réaliste de l’Intervention Expériences Animées en milieu Scolaire”; Realist evaluation of  
8  
9 the EA intervention in schools  
10

11 LST: Life skills training  
12

13 TDE: Theory driven evaluation  
14  
15  
16  
17  
18  
19  
20  
21  
22  
23  
24  
25  
26  
27  
28  
29  
30  
31  
32  
33  
34  
35  
36  
37  
38  
39  
40  
41  
42  
43  
44  
45  
46  
47  
48  
49  
50  
51  
52  
53  
54  
55  
56  
57  
58  
59  
60

For peer review only

1  
2  
3 83  
45 84 **Annex:**  
67 85  
89 86 **Table 1: Mechanisms data (M) expected and time of collection**  
1011 87  
12

| MECHANISMS                                                                       |                                                                                                                                                                                                                                             |                                           |                                                                 |                                                                                                        |
|----------------------------------------------------------------------------------|---------------------------------------------------------------------------------------------------------------------------------------------------------------------------------------------------------------------------------------------|-------------------------------------------|-----------------------------------------------------------------|--------------------------------------------------------------------------------------------------------|
| Mechanisms                                                                       | Variables                                                                                                                                                                                                                                   | Data collection                           | Time collection                                                 | Population                                                                                             |
| Representations about drinking, tobacco and cannabis use; and what influences it | <ul style="list-style-type: none"> <li>• Representations about drinking, tobacco and cannabis use</li> <li>• The role of social influence on consumption (initiation and use)</li> <li>• The short-term effects of use and abuse</li> </ul> | Non-directive interviews (IP 1+IP2) (160) | During the 2 first academic years (September 2019 to June 2021) | At least 80 pupils the first 2 years randomly selected (i.e. 2 per class and 8 per establishment/year) |

13  
14  
15  
16  
17  
18  
19  
20  
21  
22  
23  
24  
25  
26  
27  
28  
29  
30  
31  
32  
33  
34  
35  
36  
37  
38  
39  
40  
41  
42  
43  
44  
45  
46



1  
2  
3  
4  
5  
6  
7  
8  
9  
10  
11  
12  
13  
14  
15  
16  
17  
18  
19  
20  
21  
22  
23  
24  
25  
26  
27  
28  
29  
30  
31  
32  
33  
34  
35  
36  
37  
38  
39  
40  
41  
42  
43  
44  
45  
46

|                                                                                                                                  |                                                                                                                                                                                                                                                                                                                                                                                                                                                            |                                          |                                                                 |                                                                                                        |
|----------------------------------------------------------------------------------------------------------------------------------|------------------------------------------------------------------------------------------------------------------------------------------------------------------------------------------------------------------------------------------------------------------------------------------------------------------------------------------------------------------------------------------------------------------------------------------------------------|------------------------------------------|-----------------------------------------------------------------|--------------------------------------------------------------------------------------------------------|
|                                                                                                                                  | <ul style="list-style-type: none"> <li>• User rates among adolescents</li> <li>• Portrayal of drinking, tobacco and cannabis use: parties, fitting in, being accepted</li> <li>• Social acceptability of drinking, tobacco and cannabis use</li> <li>• The role of peers</li> <li>• The role of the media in encouraging alcohol, tobacco and cannabis use.</li> </ul>                                                                                     | Questionnaires T0, T1                    | September 2019 and June 2022                                    | Q : 1000 pupils / wave                                                                                 |
| Life skills for preventing addiction including tobacco, alcohol and cannabis use, and activated / mobilized through the sessions | <ul style="list-style-type: none"> <li>• Personal self-management skills : self-esteem, problem-solving abilities, reducing stress and anxiety</li> <li>• General social skills: overcoming shyness, communicating clearly, building relationships</li> <li>• Drug resistance skills: defenses against pressure to use alcohol, cannabis and other drugs, identify the consequence of substance use, risk-taking and the influence of the media</li> </ul> | Non-directive interviews (IP1+IP2) (160) | During the 2 first academic years (September 2019 to June 2021) | At least 80 pupils the first 2 years randomly selected (i.e. 2 per class and 8 per establishment/year) |
|                                                                                                                                  |                                                                                                                                                                                                                                                                                                                                                                                                                                                            | Questionnaires T0, T1                    | September 2019 and June 2022                                    | 1000 pupils / wave                                                                                     |

---

**Contextual data (related to *Expériences Animées* intervention - Ci)**


---

| Variables                                                                                                                                                                                                                                                                                                                                                                                                            | Data collection                                             | Time collection                                                 | Population                                                                                                                                                                                                                        |
|----------------------------------------------------------------------------------------------------------------------------------------------------------------------------------------------------------------------------------------------------------------------------------------------------------------------------------------------------------------------------------------------------------------------|-------------------------------------------------------------|-----------------------------------------------------------------|-----------------------------------------------------------------------------------------------------------------------------------------------------------------------------------------------------------------------------------|
| <ul style="list-style-type: none"> <li>Intervention climate within the establishment</li> <li>Conditions of session delivery</li> <li>Characterization of the feedback and sharing sequences (spatial organization, relations between pupils/session leaders/others)</li> </ul>                                                                                                                                      | Non-directive interviews (IP1+IP2) (160)                    | During the 2 first academic years (September 2019 to June 2021) | At least 80 pupils the first 2 years randomly selected (i.e. 2 per class and 8 per establishment/year)                                                                                                                            |
| <ul style="list-style-type: none"> <li>Intervention climate within the establishment</li> <li>Reception given by the school staff as a whole</li> <li>Conditions of session delivery</li> <li>Motivation levels of the session leaders and teachers in attendance</li> <li>Characterization of the feedback and sharing sequences (spatial organization, relations between pupils/session leaders/others)</li> </ul> | Observations (70)                                           | September 2019 to June 2022                                     | Program presentation for the school staff when the program starts (1 presentation per establishment) And at least 2 observation sessions per establishment and per year<br><br>Reports for all the sessions that are not observed |
|                                                                                                                                                                                                                                                                                                                                                                                                                      | Semi-structured interviews (IE1+IE2) (66 interviews at all) | June 2020 and June 2022                                         | 3 education professionals per establishment (the nurse, the headmaster, a teacher whose class is involved in                                                                                                                      |

the intervention) (30 interviews) and 3 session leaders:  
the same people in 2020 and in 2022

**Contextual data (operational setting - Ce)**

| Public                                      | Variables                                                                                                                                                                                                                                            | Data collection                                             | Time collection                              | Population                                                                                                                                                                                                 |
|---------------------------------------------|------------------------------------------------------------------------------------------------------------------------------------------------------------------------------------------------------------------------------------------------------|-------------------------------------------------------------|----------------------------------------------|------------------------------------------------------------------------------------------------------------------------------------------------------------------------------------------------------------|
| Pupils                                      | Characteristics                                                                                                                                                                                                                                      | Non-directive                                               | During the 2 first                           | At least 80 pupils the first 2 years randomly selected                                                                                                                                                     |
|                                             | <ul style="list-style-type: none"> <li>• Acceptability</li> <li>• Acceptation of the intervention</li> <li>• Their role in it, support or not toward the intervention</li> <li>• Opinion about the intervention and its effects on pupils</li> </ul> | interviews (IP1+IP2) (160)                                  | academic years (September 2019 to June 2021) | (i.e. 2 per class and 8 per establishment/year)                                                                                                                                                            |
| Session leaders and education professionals | Characteristics <ul style="list-style-type: none"> <li>• Acceptability</li> <li>• Acceptation of the intervention</li> <li>• Their role in it, support or not toward the intervention</li> </ul> Facilitating/ limiting factors of change            | Semi-structured interviews (IE1+IE2) (66 interviews at all) | June 2020/2022                               | 3 education professionals per establishment (the nurse, the headmaster, a teacher whose class is involved in the intervention) (30 interviews) and 3 session leaders : the same people in 2020 and in 2022 |

Opinion about the intervention and its effects on  
pupils

| Establishments | Characteristics                                                                                                                                                                                                                                                                                                                                                                                                                                                                                                                                                                                                                                                                             | Scorecard from the    | September 2019 | Every establishment included in <i>Expériences Animées</i> |
|----------------|---------------------------------------------------------------------------------------------------------------------------------------------------------------------------------------------------------------------------------------------------------------------------------------------------------------------------------------------------------------------------------------------------------------------------------------------------------------------------------------------------------------------------------------------------------------------------------------------------------------------------------------------------------------------------------------------|-----------------------|----------------|------------------------------------------------------------|
|                | <ul style="list-style-type: none"> <li>• Type of establishment (general/vocational, priority education areas – yes/no-)</li> <li>• Level of urbanization of the town or city where the establishment is located</li> <li>• Deprivation index of the school area</li> <li>• Number of pupils, male/female ratio, number of repeaters per establishment</li> <li>• Proximity to a center for young substance users and availability rate where appropriate</li> <li>• Availability rate of the nurse</li> <li>• Establishments already involved in Expériences Animées in previous years (yes/no)</li> </ul> <p>Occasional awareness campaigns on addiction in the establishment (yes/no)</p> | education authorities |                |                                                            |

1  
2  
3  
4  
5  
6  
7  
8  
9  
10  
11  
12  
13  
14  
15  
16  
17  
18  
19  
20  
21  
22  
23  
24  
25  
26  
27  
28  
29  
30  
31  
32  
33  
34  
35  
36  
37  
38  
39  
40  
41  
42  
43  
44  
45  
46

---

|                                       |                                                                                                                                                                                                                                                                                                                            |                                     |                |                                                                      |
|---------------------------------------|----------------------------------------------------------------------------------------------------------------------------------------------------------------------------------------------------------------------------------------------------------------------------------------------------------------------------|-------------------------------------|----------------|----------------------------------------------------------------------|
| <i>Expériences animées</i><br>funders | Characteristics<br><ul style="list-style-type: none"> <li>• Acceptation of the intervention</li> <li>• Opinion about the intervention and its effects on pupils</li> <li>• Interest about <i>Expériences animées</i></li> </ul> Facilities and difficulties to fund <i>Expériences Animées</i> , barriers and facilitators | Semi-structured interviews (IF) (3) | September 2019 | 3 people from the funding organization of <i>Expériences Animées</i> |
|---------------------------------------|----------------------------------------------------------------------------------------------------------------------------------------------------------------------------------------------------------------------------------------------------------------------------------------------------------------------------|-------------------------------------|----------------|----------------------------------------------------------------------|

---

88

1  
2  
3 89  
4 90  
5 91  
6 92

**Table 2: Sources of questions included in T0 Questionnaire**

| SURVEY ITEMS                                              | REFERENCE         |
|-----------------------------------------------------------|-------------------|
| <b>General characteristics</b>                            |                   |
| Sex, Age                                                  | -                 |
| Geographic Environment                                    | -                 |
|                                                           | -                 |
|                                                           | -                 |
| Family environment                                        | HBSC              |
|                                                           | HBSC              |
|                                                           | HBSC              |
|                                                           | HBSC              |
|                                                           | HBSC              |
| Socio-economic situation                                  | -                 |
|                                                           | -                 |
| School climate                                            | HBSC/Unplugged    |
| <b>Substance consumption and health care use</b>          |                   |
| Use of support service                                    | -                 |
| Alcohol consumption                                       | HBSC (modified)   |
|                                                           | HBSC (modified)   |
| Heavy drinking episodes                                   | HBSC (modified)   |
|                                                           | HBSC (modified)   |
|                                                           | ESPAD (modified)  |
| Cannabis consumption                                      | HBSC (modified)   |
|                                                           | -                 |
| Tobacco consumption                                       | HBSC (modified)   |
|                                                           | -                 |
|                                                           | Unplugged         |
| <b>Representations about substance use and influences</b> |                   |
| Social influences                                         |                   |
| <i>Cannabis</i>                                           | EROPP             |
|                                                           | EMCDDA (modified) |
|                                                           | EMCDDA (modified) |
| <i>Alcohol</i>                                            | ISRD (modified)   |
|                                                           | ISRD              |
|                                                           | EMCDDA (modified) |
|                                                           | EMCDDA (modified) |
| <i>Tobacco</i>                                            | EMCDDA (modified) |
|                                                           | EMCDDA (modified) |
| Beliefs in consequences                                   |                   |

1  
2  
3  
4  
5  
6  
7  
8  
9  
10  
11  
12  
13  
14  
15  
16  
17  
18  
19  
20  
21  
22  
23  
24  
25  
26  
27  
28  
29  
30  
31  
32  
33  
34  
35  
36  
37  
38  
39  
40  
41  
42  
43  
44  
45  
46  
47  
48  
49  
50  
51  
52  
53  
54  
55  
56  
57  
58  
59  
60

|  |                                     |                                |
|--|-------------------------------------|--------------------------------|
|  |                                     | Unplugged/emcdda<br>(modified) |
|  | <i>Alcohol</i>                      |                                |
|  | <i>Cannabis</i>                     | Unplugged (modified)           |
|  | Portrayal of use                    |                                |
|  | <i>Alcohol</i>                      | DMQ-R                          |
|  | <i>Cannabis</i>                     | DMQ-R                          |
|  | Knowledge                           |                                |
|  | <i>Alcohol</i>                      | EROPP (modified)               |
|  |                                     | EROPP (modified)               |
|  | <i>Cannabis</i>                     | EROPP                          |
|  |                                     | EROPP                          |
|  | History of effects of use and abuse | Unplugged/Emcdda<br>(modified) |
|  |                                     | -                              |

### Life Skills

|                                             |                                      |
|---------------------------------------------|--------------------------------------|
| Peer pressure resistance                    | Unplugged<br>Peer pressure Inventory |
| Decision making and problem solving ability | Unplugged                            |
| Creative and critical thinking              | Unplugged                            |
| Communication and interpersonal skills      | Unplugged                            |
| Self awareness and empathy                  | Unplugged                            |
| Assertiveness                               | Unplugged                            |
| Coping with emotion and stress ability      | Unplugged                            |

93  
94  
95  
96  
97  
98 HBSC, Health Behavior n School-Aged Children; ESPADD, European School Survey on Alcohol and Other Drugs; EROPP,  
99 Enquête sur les Représentations, Opinions et Perceptions relatives aux Psychotropes i.e. Survey on Representations, Views  
100 and Perceptions of Psychotropic Drugs; ISRD, International Self Report Delinquency; EMCDDA, European Monitoring Centre  
101 for Drugs and Drug Addiction; DMQ-R, Drinking Motives Questionnaire, Revised.

| BMJ Open            |    |                                                                                                                                                                                                                                                                                                                                                                                                                                                                                                                                                                                                                                                                                                                                                                                              | Reported in document Y/N/Unclear | Page(s) in document |
|---------------------|----|----------------------------------------------------------------------------------------------------------------------------------------------------------------------------------------------------------------------------------------------------------------------------------------------------------------------------------------------------------------------------------------------------------------------------------------------------------------------------------------------------------------------------------------------------------------------------------------------------------------------------------------------------------------------------------------------------------------------------------------------------------------------------------------------|----------------------------------|---------------------|
| TITLE               |    |                                                                                                                                                                                                                                                                                                                                                                                                                                                                                                                                                                                                                                                                                                                                                                                              |                                  |                     |
| 1                   |    | In the title, identify the document as a realist evaluation                                                                                                                                                                                                                                                                                                                                                                                                                                                                                                                                                                                                                                                                                                                                  | Y                                | 1                   |
| SUMMARY OR ABSTRACT |    |                                                                                                                                                                                                                                                                                                                                                                                                                                                                                                                                                                                                                                                                                                                                                                                              |                                  |                     |
| 2                   | 2  | Journal articles will usually require an abstract, while reports and other forms of publication will usually benefit from a short summary. The abstract or summary should include brief details on: the policy, programme or initiative under evaluation; programme setting; purpose of the evaluation; evaluation question(s) and/or objective(s); evaluation strategy; data collection, documentation and analysis methods; key findings and conclusions Where journals require it and the nature of the study is appropriate, brief details of respondents to the evaluation and recruitment and sampling processes may also be included Sufficient detail should be provided to identify that a realist approach was used and that realist programme theory was developed and/or refined | Y                                | 2                   |
| INTRODUCTION        |    |                                                                                                                                                                                                                                                                                                                                                                                                                                                                                                                                                                                                                                                                                                                                                                                              |                                  |                     |
| 3                   | 3  | Rationale for evaluation                                                                                                                                                                                                                                                                                                                                                                                                                                                                                                                                                                                                                                                                                                                                                                     | Y                                | 4                   |
| 4                   | 4  | Programme theory                                                                                                                                                                                                                                                                                                                                                                                                                                                                                                                                                                                                                                                                                                                                                                             | Y                                | 4                   |
| 5                   | 5  | Evaluation questions, objectives and focus                                                                                                                                                                                                                                                                                                                                                                                                                                                                                                                                                                                                                                                                                                                                                   | Y                                | 5                   |
| 6                   | 6  | Ethical approval                                                                                                                                                                                                                                                                                                                                                                                                                                                                                                                                                                                                                                                                                                                                                                             | Y                                | 2 and 22            |
| METHODS             |    |                                                                                                                                                                                                                                                                                                                                                                                                                                                                                                                                                                                                                                                                                                                                                                                              |                                  |                     |
| 7                   | 7  | Rationale for using realist evaluation                                                                                                                                                                                                                                                                                                                                                                                                                                                                                                                                                                                                                                                                                                                                                       | Y                                | 8                   |
| 8                   | 8  | Environment surrounding the evaluation                                                                                                                                                                                                                                                                                                                                                                                                                                                                                                                                                                                                                                                                                                                                                       | Y                                | 6                   |
| 9                   | 9  | Describe the programme policy, initiative or product evaluated                                                                                                                                                                                                                                                                                                                                                                                                                                                                                                                                                                                                                                                                                                                               | Y                                | 9                   |
| 10                  | 10 | Describe and justify the evaluation design                                                                                                                                                                                                                                                                                                                                                                                                                                                                                                                                                                                                                                                                                                                                                   | Y                                | 12                  |
| 11                  | 11 | Data collection methods                                                                                                                                                                                                                                                                                                                                                                                                                                                                                                                                                                                                                                                                                                                                                                      | Y                                | 13-18               |
| 12                  | 12 | Recruitment process and sampling strategy                                                                                                                                                                                                                                                                                                                                                                                                                                                                                                                                                                                                                                                                                                                                                    | Y                                | 11                  |
| 13                  | 13 | Data analysis                                                                                                                                                                                                                                                                                                                                                                                                                                                                                                                                                                                                                                                                                                                                                                                | Y                                | 18-20               |
| RESULTS             |    |                                                                                                                                                                                                                                                                                                                                                                                                                                                                                                                                                                                                                                                                                                                                                                                              |                                  |                     |
| 14                  | 14 | Details of participants                                                                                                                                                                                                                                                                                                                                                                                                                                                                                                                                                                                                                                                                                                                                                                      | Y                                | 17 AND 28-33        |
| 15                  | 15 | Main findings                                                                                                                                                                                                                                                                                                                                                                                                                                                                                                                                                                                                                                                                                                                                                                                | y                                | 20                  |
| DISCUSSION          |    |                                                                                                                                                                                                                                                                                                                                                                                                                                                                                                                                                                                                                                                                                                                                                                                              |                                  |                     |
| 16                  | 16 | Summary of findings                                                                                                                                                                                                                                                                                                                                                                                                                                                                                                                                                                                                                                                                                                                                                                          | y                                | 21                  |
| 17                  | 17 | Strengths, limitations and future directions                                                                                                                                                                                                                                                                                                                                                                                                                                                                                                                                                                                                                                                                                                                                                 | y                                | 22                  |
| 18                  | 18 | Comparison with existing literature                                                                                                                                                                                                                                                                                                                                                                                                                                                                                                                                                                                                                                                                                                                                                          | NOT APPLICABLE                   |                     |
| 19                  | 19 | Conclusion and recommendations                                                                                                                                                                                                                                                                                                                                                                                                                                                                                                                                                                                                                                                                                                                                                               | NOT APPLICABLE                   |                     |
| 20                  | 20 | Funding and conflict of interest                                                                                                                                                                                                                                                                                                                                                                                                                                                                                                                                                                                                                                                                                                                                                             | Y                                | 26                  |



# BMJ Open

## Realist evaluation of a theory-based life skills program aiming to prevent addictive behaviors in adolescents: The ERIEAS study protocol

|                                 |                                                                                                                                                                                                                                                                                                                                                                                                                                                                                                                                                                                                                       |
|---------------------------------|-----------------------------------------------------------------------------------------------------------------------------------------------------------------------------------------------------------------------------------------------------------------------------------------------------------------------------------------------------------------------------------------------------------------------------------------------------------------------------------------------------------------------------------------------------------------------------------------------------------------------|
| Journal:                        | <i>BMJ Open</i>                                                                                                                                                                                                                                                                                                                                                                                                                                                                                                                                                                                                       |
| Manuscript ID                   | bmjopen-2019-034530.R1                                                                                                                                                                                                                                                                                                                                                                                                                                                                                                                                                                                                |
| Article Type:                   | Protocol                                                                                                                                                                                                                                                                                                                                                                                                                                                                                                                                                                                                              |
| Date Submitted by the Author:   | 02-Apr-2020                                                                                                                                                                                                                                                                                                                                                                                                                                                                                                                                                                                                           |
| Complete List of Authors:       | Martin-Fernandez, Judith; ISPED, Chaire de prévention<br>Affret, Aurelie; ISPED, Chaire de prévention<br>Martel, Emma; University of Bordeaux Faculty of Medical Sciences<br>Gallard, Romain; ISPED<br>merchadou, Laurence; INSERM Bordeaux Population Health Research Center<br>Moinot, Laetitia; i, INSERM Bordeaux Population Health Research Center<br>Termote, Monique; INSERM Bordeaux Population Health Research Center<br>Dejarnac, Vincent; CHU de Bordeaux<br>Alla, François; CHU INSERM. Bordeaux Population Health Research Center. UMR 1219 CIC-EC 1401, Université de Bordeaux,<br>Cambon, Linda; ISPED |
| <b>Primary Subject Heading</b>: | Public health                                                                                                                                                                                                                                                                                                                                                                                                                                                                                                                                                                                                         |
| Secondary Subject Heading:      | Addiction, Evidence based practice                                                                                                                                                                                                                                                                                                                                                                                                                                                                                                                                                                                    |
| Keywords:                       | Life skills, Addictions, Realist evaluation, PREVENTIVE MEDICINE                                                                                                                                                                                                                                                                                                                                                                                                                                                                                                                                                      |
|                                 |                                                                                                                                                                                                                                                                                                                                                                                                                                                                                                                                                                                                                       |

SCHOLARONE™  
Manuscripts



I, the Submitting Author has the right to grant and does grant on behalf of all authors of the Work (as defined in the below author licence), an exclusive licence and/or a non-exclusive licence for contributions from authors who are: i) UK Crown employees; ii) where BMJ has agreed a CC-BY licence shall apply, and/or iii) in accordance with the terms applicable for US Federal Government officers or employees acting as part of their official duties; on a worldwide, perpetual, irrevocable, royalty-free basis to BMJ Publishing Group Ltd ("BMJ") its licensees and where the relevant Journal is co-owned by BMJ to the co-owners of the Journal, to publish the Work in this journal and any other BMJ products and to exploit all rights, as set out in our [licence](#).

The Submitting Author accepts and understands that any supply made under these terms is made by BMJ to the Submitting Author unless you are acting as an employee on behalf of your employer or a postgraduate student of an affiliated institution which is paying any applicable article publishing charge ("APC") for Open Access articles. Where the Submitting Author wishes to make the Work available on an Open Access basis (and intends to pay the relevant APC), the terms of reuse of such Open Access shall be governed by a Creative Commons licence – details of these licences and which [Creative Commons](#) licence will apply to this Work are set out in our licence referred to above.

Other than as permitted in any relevant BMJ Author's Self Archiving Policies, I confirm this Work has not been accepted for publication elsewhere, is not being considered for publication elsewhere and does not duplicate material already published. I confirm all authors consent to publication of this Work and authorise the granting of this licence.

1  
2  
3 1 Realist evaluation of a theory-based life skills program aiming to prevent addictive behaviors in adolescents: The  
4  
5 2 ERIEAS study protocol  
6  
7 3

8  
9 4 Judith Martin Fernandez<sup>1 2\*</sup>, Aurélie Affret<sup>1 2\*</sup>, Emma Martel<sup>1 3</sup>, Romain Gallard<sup>1 2</sup>, Laurence Merchadou<sup>2</sup>,  
10  
11 5 Laetitia Moinot<sup>2</sup>, Monique Termote<sup>2</sup>, Vincent Dejarnac<sup>4</sup>, François Alla<sup>2,5</sup>, Linda Cambon<sup>1 2</sup>  
12

13 6 \* First co-authors  
14  
15 7

16  
17 8 <sup>1</sup> Chaire de prévention ISPED/SPF, University of Bordeaux, Bordeaux, France

18  
19 9 <sup>2</sup> INSERM Bordeaux Population Health Research Center, UMR 1219, CIC1401-EC, University of Bordeaux,  
20 10 ISPED, 33000, Bordeaux, France.

21 11 <sup>3</sup> University of Bordeaux, ISPED, F-33000 Bordeaux, France

22 12 <sup>4</sup> DRCI, CHU of Bordeaux, Bordeaux, France

23 13 <sup>5</sup> Prevention Unit, CHU of Bordeaux, Bordeaux, France

24 14 Corresponding author:

25  
26 15 Judith Martin-Fernandez

27 16  
28 17 Mob.+33664701772 / Tel.0557571043

29 18  
30 19 [judith.martin-fernandez@u-bordeaux.fr](mailto:judith.martin-fernandez@u-bordeaux.fr)  
31 20  
32  
33  
34 21  
35  
36 22  
37  
38  
39 23  
40  
41 24  
42  
43  
44 25  
45  
46  
47  
48  
49  
50  
51  
52  
53  
54  
55  
56  
57  
58  
59  
60

## 26 ABSTRACT

### 27 Introduction

28 Adolescence is a sensitive life stage during which tobacco, alcohol, and cannabis are used as  
29 ways to learn and adopt roles. There is a great deal of interest in substance use (SU) prevention  
30 programs for young people that work to change representations of these products and help with  
31 mobilization of life skills. Unfortunately, few existing programs are evidence-based.

32 In France, a program called Expériences Animées (EA, Animated Experiences) has been  
33 developed, inspired by life skills development programs that have been proven to be successful.

34 The EA program uses animated short movies and talks with high school and secondary school  
35 pupils about the use of psychoactive substances and addictions. By allowing life skills  
36 mobilization and modifying representations and beliefs about SU, it is aimed at delaying  
37 initiation of use of psychoactive substances, preventing adolescents from becoming regular  
38 consumers, reducing the risks and harms related to use of these substances, and opening the  
39 way for adapted support measures.

40 We are interested in understanding how, under what circumstances, through which  
41 mechanisms, and among which adolescents the EA program works. Therefore, we have  
42 developed the ERIEAS study.

### 44 Methods and analysis

45 EA will be conducted in 10 schools. A multi-case approach will be adopted with the aim of  
46 developing and adjusting an intervention theory. The study comes under the theory-driven  
47 evaluation framework. The investigation methodology will include four stages: i) elaboration  
48 of a middle-range theory; ii) data collection for validating/adjusting the theory; iii) data  
49 analysis; and iv) refinement and adjustment of the middle-range theory and definition of the  
50 program's key functions.

### 52 Ethics and dissemination

53 The study will provide evidence-based results to health authorities to help in the rollout of  
54 health promotion strategies in schools. It will provide knowledge about the strategic  
55 configurations most suitable for leading to life skills mobilization and change young people's  
56 representations about SU. The project will be carried out with full respect of current relevant  
57 legislation (e.g. the Charter of Fundamental Rights of the EU) and international conventions  
58 (e.g. Helsinki Declaration). It follows the relevant French legislation of the research category

1  
2  
3 59 on interventional research protocol involving the human person. The protocol was approved  
4  
5 60 by the Comité et Protection des Personnes (CPP) i.e. Committee for the Protection of Persons  
6  
7 61 CPP SUD-EST VI n°: AU 1525 and was reported to the Agence Française de Sécurité Sanitaire  
8  
9 62 des Produits de Santé (ANSM) i.e. the French National Agency for the Safety of Health  
10  
11 63 Products. It is in conformity with reference methodology MR003 of Bordeaux University  
12  
13 64 Hospital (CNIL n° 2026779v0). This research has been registered on ClinicalTrials.gov (No.  
14  
15 65 NCT04110626). The research project is registered in the European database ID-RCB (No.  
16  
17 66 2019-A01003-54).

17 67

18 68

19 69

20 70

21 71 Strengths and limitations of this study:

22 72

- 23 73 • Consistent with bottom-up approaches, our study—a realist evaluation based on a natural  
24 74 experiment mobilizing mixed-models methods and a preference stated method (Discrete  
25 75 Choice Experiment [DCE])—is an innovative way to evaluate a complex intervention.
- 26 76 • The conclusions will be highly replicable and will provide a basis for designing other  
27 77 interventions using identified key functions.
- 28 78 • Our study will produce detailed recommendation and further strategies to develop the EA  
29 79 program and adapt it to various contexts.

30 80

31 81

32 82

33 83

#### 34 84 **KEYWORDS**

35 85 Life skills; Addictions; Adolescents; Program, Realist evaluation; Complex intervention; Prevention; Public health

36 86 Word count : 6111

37 87

38 88

## 89 INTRODUCTION

90 Addictive behaviors are major contributors to human morbidity and premature death, with  
91 tobacco and alcohol use being the most prevalent addictive behaviors and cannabis the most  
92 prevalent “unsanctioned psychoactive drug” used worldwide [1]. Adolescence is a particularly  
93 sensitive life stage where tobacco, alcohol, and cannabis are used as a means of learning and  
94 taking on roles. Consumption of these substances and their associations with cancer risk,  
95 chronic disease, and health conditions have been clearly discussed in the literature [2,3]. As  
96 adolescence is a period during which the brain undergoes profound remodeling in a number of  
97 areas, alcohol and cannabis consumption can lead to impaired learning ability, memory, and  
98 brain development and to difficulties in cognitive control and emotion regulation [4–6].  
99 The WHO defines life skills as abilities for adaptive and positive behavior that enable  
100 individuals to deal effectively with the demands and challenges of everyday life [7]. In 2010,  
101 Botvin and Griffin reviewed school-based substance use prevention programs that have been  
102 tested and proven effective [8]. These programs focus on building drug resistance skills, general  
103 self-regulation and social skills, and/or changing normative expectations regarding inaccurate  
104 beliefs about the high prevalence of substance use [8]. A major focus is the development of  
105 alcohol, tobacco, and cannabis prevention programs for young people that work on these skills  
106 and on changing representations about these products and, therefore, their consumption.  
107 Many programs focusing on addiction prevention have been implemented in schools [9,10].  
108 Unfortunately, there are few evidence-based and life skills programs [9,11]. In France, since  
109 2015, the organization Association Ressources et Initiatives Addictions (ARIA, Association for  
110 Resources and Initiatives on Addictions), with a clinical psychologist and an addiction  
111 psychiatrist, have developed a program called Expériences Animées (EA, Animated  
112 Experiences in English) inspired by life skills development programs that have proven to be  
113 successful, such as the Life Skills Training program [12], the Unplugged program [13], and the  
114 In Media Program [14]. Since January 2020, the Coreadd organization (regional coordination  
115 for addiction prevention) has assumed responsibility for the EA Program.  
116 The EA program involves animated short movies and talks with high school and secondary  
117 school pupils about the use of psychoactive substances and addictions. Priority is given to high  
118 schools in priority education areas and to vocational high schools.  
119 The program draws on the recommendations of Botvin and Griffin [8,15] in terms of theoretical  
120 origins, goals, and means. The EA program’s overall purpose is to: delay initiation of substance  
121 use; prevent adolescents from becoming regular consumers of psychoactive substances; reduce

1  
2  
3 122 the risks and harm related to consumption of these products; and open the way for adapted  
4  
5 123 support measures.

6 124 The EA program has not been evaluated; to understand how, under what circumstances, through  
7  
8 125 which mechanisms, and among which adolescents this program works, we developed the  
9  
10 126 ERIEAS study (“Evaluation Réaliste de l’Intervention Expériences Animées en milieu  
11  
12 127 Scolaire”; Realist Evaluation of the EA Intervention in Schools).

13  
14 128

## 15 129 **STUDY OBJECTIVES AND LOCATION**

16 130 Our study is aimed at evaluating the EA program to set out an intervention theory for the  
17  
18 131 program. To do so, the study has two main objectives:

19  
20 132

21  
22 133 • First objective: To characterize the effects (Outcomes) on the pupils of high schools in terms  
23  
24 134 of:

25  
26 135 ○ Tobacco, alcohol, and cannabis use.

27  
28 136 ○ Consultation with healthcare professionals for problematic substance use.

29  
30 137

31  
32 138 • Second objective: To characterize the context and mechanisms of action (Mechanisms and  
33  
34 139 Context), and to document the conditions of effectiveness of EA in terms of contextual  
35  
36 140 conditions or mechanisms triggered by the program. That is, to identify the program’s key  
37  
38 141 functions [16], which may be contextual conditions or action mechanisms, related to:

39  
40 142 ○ The pupils’ characteristics.

41  
42 143 ○ The practitioners’ characteristics.

43  
44 144 ○ The design of materials and, in particular, the techniques employed, their use during  
45  
46 145 program sessions, and the activities for teaching staff and parents.

47  
48  
49 146 ○ The macro- (e.g., classes, schools, cities) and micro- (e.g., supervised short films  
50  
51 147 and talks) intervention environments.

52  
53 148

54  
55 149 The second objective offers a way to identify the key functions of the EA with a view to  
56  
57 150 transferability (13,14) (i.e., transferring key features and adapting non-key aspects) and  
58  
59 151 comparison of EA with other implemented or transferred programs, such as Unplugged [13].  
60

1  
2  
3 152 The EA program takes place in 10 schools (three high schools and seven secondary schools) in  
4  
5 153 the department of Charente in Western France. The ERIEAS study takes place in these 10  
6  
7 154 schools. It began in January 2019 and will run until December 2022. Inclusion of participants  
8  
9 155 began on September 30, 2019.  
10  
11  
12 156  
13  
14 157

## 158 **METHODS AND ANALYSIS**

16 159 This report is consistent with the RAMESES II reporting standards for realist interventions (cf.  
17  
18 160 checklist in additional file) [17]. ERIEAS seeks to evaluate the actual impact and the factors  
19  
20 161 involved of the EA program using a realist evaluation. For this purpose, a multi-case approach  
21  
22 162 will be adopted considering each school as a “case”[18,19]. The study adheres to the theory-  
23  
24 163 driven evaluation framework [20–23] where the realist evaluation method and contribution  
25  
26 164 analysis [24,25] are used to explore the effects, mechanisms, and influence of context on the  
27  
28 165 outcomes and to develop and adjust an intervention theory. This case-study method will help  
29  
30 166 to set out the contribution “story”: in light of the multiple factors influencing the result, does  
31  
32 167 the intervention contribute to an observed result and in what way? [25].

33 168 The study also comes under the rubric of natural experiments in intervention research. This is  
34  
35 169 because the intervention has little standardization and is not undertaken for the purposes of  
36  
37 170 research [26].  
38  
39 171

### 172 **Conceptual framework**

40  
41 173 In realist evaluation, developed by Pawson and Tilley [27], the effectiveness of the intervention  
42  
43 174 depends on the underlying mechanisms at play within a given context. The realist evaluation is  
44  
45 175 about identifying context-mechanism-outcome configurations (CMOs). The aim is to  
46  
47 176 understand how and under what circumstances an intervention works. A middle-range theory  
48  
49 177 (i.e., a theory that is aimed at describing the interactions between outcomes, mechanisms, and  
50  
51 178 contexts) is set out to highlight the mutual influences of intervention and context [28,29]. This  
52  
53 179 approach is linked to the black box paradigm [30] and differs from the experimental paradigm,  
54  
55 180 which evaluates effectiveness without looking at the mechanism by which an intervention  
56  
57 181 works or the influence of the context. Realist evaluation asks whether the intervention worked  
58  
59 182 in a way consistent with its underpinning theory. The generative causality works on three  
60  
183 assumptions [31]: i) an intervention does not work in and of itself, and it is not what produces



1  
2  
3 184 an outcome; ii) all interventions trigger a mechanism or a set of mechanisms that produce an  
4  
5 185 outcome; and iii) all interventions are delivered in a context.

6 186 Hence, the evaluation is about identifying middle-range theories. Hypothesized and validated  
7  
8 187 by empirical investigations, these CMO configurations help to understand how an intervention  
9  
10 188 brings about change, considering context and target group [28,29]. The recurrence of CMOs is  
11  
12 189 observed in successive case studies or in mixed protocols, such a realist trials [29]. Indeed, to  
13  
14 190 consider context, realist evaluators observe in successive cases what Lawson (quoted by  
15  
16 191 Pawson in 2006 [31]) calls demi-regularities of CMOs (i.e., regular although not necessarily  
17  
18 192 permanent occurrences of an outcome when an intervention triggers one or more mechanisms  
19  
20 193 in a given context) [29]. Studying these recurrences in different contexts allows the isolation of  
21  
22 194 key elements that are replicable in a family of contexts. This gives rise to middle-range theories  
23  
24 195 that become stronger as progress is made through the cases. “These middle-range theories, in  
25  
26 196 certain conditions, predict possible intervention outcomes in contexts different from the one in  
27  
28 197 which the intervention was tested” [29].  
29  
30 198

29 199

### 31 200 *Applied to our case*

32  
33 201 As the realist principle is suitable for studying non-linear interactions in complex systems, we  
34  
35 202 adopted this approach. The intervention under investigation applies to an operational program  
36  
37 203 and it is therefore important to identify its key functions [32,33], i.e., its interventional or  
38  
39 204 contextual components underpinning its effectiveness. This will allow us to hypothesize about  
40  
41 205 1) the program’s effectiveness, 2) its added value compared to other existing programs, and 3)  
42  
43 206 its specificities. Ultimately, it should enable replication [34,35].  
44  
45 207

46 208 Here, each institution involved in the EA program, with its own context, will constitute a case.  
47  
48 209 For each case, the intervention will be studied to identify the mechanisms at play in the given  
49  
50 210 context along with the variation in outcomes. CMO configurations will be identified through  
51  
52 211 analysis of each case. A cross-case analysis will highlight recurrent CMO configurations and  
53  
54 212 thus identify key features for possible replication.

55 213 In our study, outcomes are related to using tobacco, alcohol, and/or cannabis and obtaining  
56  
57 214 support from a health professional.  
58  
59  
60

1  
2  
3 215 Drawing on the literature and on the experience of professionals delivering the intervention, we  
4  
5 216 will first set out initial middle-range theories [27,31], which we will test in each case (i.e.,  
6  
7 217 schools), by collecting qualitative and quantitative data [29].

8  
9 218 The mechanisms will be identified qualitatively according to the definition of Ridde et al.: “a  
10  
11 219 mechanism is an element of reasoning and reaction of an agent with regard to an intervention  
12  
13 220 productive of an outcome in a given context” [36,37]; and the definition of Cambon et al.:  
14  
15 221 “What characterizes and punctuates the process of change and hence, the production of  
16  
17 222 outcomes”[16]. The mechanisms will be divided into those related to the session leaders and  
18  
19 223 teachers in attendance and those related to the pupils. For pupils, the literature allows us to  
20  
21 224 define two categories of mechanisms: 1) representations about alcohol, tobacco, and cannabis  
22  
23 225 consumption; and 2) life skills developed/mobilized.

24  
25 226 Contextual elements will be included among all the elements collected qualitatively that satisfy  
26  
27 227 the following definition: elements located in time and space that may affect the intervention  
28  
29 228 and the outcomes produced, and whether they relate to the session leaders, teachers, pupils,  
30  
31 229 session delivery, or the operational setting. In a realist approach, interventional elements are  
32  
33 230 part of the context. Therefore, we could distinguish between Ci (for Contextual factors linked  
34  
35 231 to the Intervention) and Ce (for Contextual factors not linked to the intervention, i.e., external  
36  
37 232 factors).

38  
39 233 Figure 1 synthesizes the principles of the realist evaluation.

40  
41 234

### 42 43 235 **The *Experiences Animées* program**

#### 44 45 236 ***The EA medium: the short-animated movies***

46  
47 237 The EA program involves showing short-animated movies followed by discussion sessions in  
48  
49 238 high schools about the use of psychoactive substances and, more generally, about all types of  
50  
51 239 addiction. To reach its target audience, the EA program uses short animated films produced by  
52  
53 240 student filmmakers (second-year students at the EMCA animated filmmaking school in  
54  
55 241 Angoulême, France). The films are made specifically for the program, and every year new  
56  
57 242 students are selected to produce new short films.

58  
59 243 A filmmaking workshop for students (20 – 26 years old) has been organized by the EA program  
60  
61 244 managers and the EMCA school board every year since 2015. During the 4-day workshop, the  
62  
63 245 students are tasked with looking at the use of psychoactive substances, and their functions, and  
64  
65 246 sharing their thoughts about how people become addicted. They are asked “What do you have  
66  
67 247 to say about it? What would you like to convey to a young audience about this issue?” The

1  
2  
3 248 program managers do not intervene in the actual screenwriting and esthetics of the films. At the  
4  
5 249 end of the workshop, the students show their proposals as filmed storyboards. Then, the  
6  
7 250 program managers select several projects for inclusion in the EA program. Some 45 films have  
8  
9 251 been produced since 2015 focusing on subjects such as food and drug addiction, as well as also  
10 252 emotional dependence and bullying. The mean duration of the films is 3 minutes.

11 253

12 254

### 16 255 *Delivery of the sessions*

17  
18  
19  
20 256 The interventions during the sessions consist of four phases.

- 21 257
- 22 • Presentation and instruction: In the first session, session leaders present the program and  
23 258 the instructions to follow during the sessions. After the first session, and at the beginning  
24 259 of each subsequent session, pupils are briefly reminded about the previous session (i.e.,  
25 260 what the session leaders noted and remarked) and the instructions. Pupils are then told, “We  
26 261 will watch a short film and then discuss the content together, sharing our thoughts and  
27 262 feelings about what we have seen.”
  - 28 263 • Film: Two or three films are shown during each session. After watching each film, pupils  
29 264 are encouraged to discuss freely the issues raised. Films are selected by session leaders  
30 265 according to the previous discussion and the specific context of the session.
  - 31 266 • Interactions about the films: These include reflective dialogue, sharing thoughts and  
32 267 experiences (experiential approach) with everyone able and willing to contribute. After  
33 268 watching each film, pupils are given time for critical reflection, positioning, reformulating,  
34 269 and summarizing.
  - 35 270 • End of the session: At the end of a session, pupils go over the keywords from the session,  
36 271 and summarize what was said.

37  
38  
39  
40 272 The sessions are facilitated by two psychologists as session leaders. Their demeanor when  
41 273 delivering the sessions is important. They should act as clinicians who are there to listen, to  
42 274 help pupils reflect on the issues raised, to encourage them to express themselves freely while  
43 275 allowing others to do so, and to facilitate dialogue. A teacher, school nurse, or other staff  
44 276 member from the school also attends the sessions. Classroom tables are arranged in a U shape  
45 277 or in a rectangle (if there are many pupils in the class).

1  
2  
3 278 In a given high school, one session per term is delivered for each class, i.e., three film showings  
4  
5 279 (sessions) per academic year.

6 280  
7

## 8 9 281 **Study population**

10  
11 282 Different groups will be followed in the ERIEAS study:

- 12  
13 283 • Pupils: The sample involved in the EA program will be studied. From the 2019/2020  
14 284 academic year until the 2021/2022 academic year (3 academic years), the EA program will  
15 285 be delivered in 10 institutions (a total of 40 classes and around 1000 pupils).
- 16  
17 286 • Education community members: One teacher whose class is involved in the sessions, the  
18 287 school nurse, and the headmaster, i.e., a total of three people per institution will be  
19 288 interviewed in the study.
- 20  
21 289 • Session leaders: Three persons will be interviewed.
- 22  
23 290 • Funders: Three funders will be interviewed.

24  
25 291

26  
27 292 The inclusion criteria will be:

- 28  
29 293 • For pupils:
  - 30  
31 294 ○ Pupils from the 10 secondary and high schools involved in the EA program, in 7th  
32 295 grade and 10th grade in the 2019/2020 academic year, willing to participate and  
33 296 whose parents/guardians have given consent for the child's participation.
  - 34  
35 297 ○ Pupils of these 10 schools who will enter 8th grade and 11th grade in September  
36 298 2020, and 9th grade and 12th grade in September 2021 who are willing to participate  
37 299 and whose parents/guardians have given consent for the child's participation.
- 38  
39 300 • For education community members, session leaders, and funders: willingness to participate.

40  
41 301 The only exclusion criteria will be to be under legal protection.

42  
43 302

## 44 303 **Patient and Public Involvement**

45  
46 304 The ERIEAS study does not include any patient or public involvement in terms of setting  
47 305 research priorities, defining research questions or outcomes, providing input into the study

1  
2  
3 306 design, or disseminating the results. The research participants will be called on to answer  
4  
5 307 questionnaires or interviews.

6 308 .

### 9 309 **Study design**

11 310 According to theory-driven evaluation methodology [20–23], the study will be composed of  
12  
13 311 four stages, as outlined in Figure 2.

14 312

15 313

#### 18 314 ***Stage 1 – Literature analysis***

21 315 The first stage involves a literature analysis to design and adapt investigation tools and  
22  
23 316 contribute to elaboration of the initial middle-range theories (stage 2).

24 317 A review has been conducted to identify strategies that are effective in school settings in helping

26 318 pupils to change their representations of alcohol, cannabis, and tobacco use, and to develop or

27 319 mobilize life skills to prevent addiction. The data sources used were: PsycInfo, PsycArticles,

28 320 Psychology and Behavioral Sciences Collection, SocIndex, Cairn, and Web of Sciences.

31 321 The keywords were “life skills” and [“adolescents” or “young adults” or “teenagers”]. The

32 322 inclusion criteria were: English or French language publications from 2014 to 2019; original or

33 323 methodological articles focusing on the evaluation or exploration of intervention techniques

34 324 applied to school settings; interventions aimed at changing representations; life skills as a way

35 325 of delaying experimentation with alcohol, tobacco, and cannabis, and reducing their use.

36 326 Using the software Covidence®, two researchers conducted a double-blind review of the

37 327 selected reports and extracted information regarding the intervention (name, location,

38 328 population, design), the evaluation design (method, main and second outcomes), the result of

39 329 the intervention, its key functions and context of implementation. The purpose of this review

40 330 was to extract information about the contexts, mechanisms, and outcomes that were the focus

41 331 of our study. Our analysis questions were: What are the most effective intervention techniques?

42 332 What representations and skills are they effective for? What contextual conditions influence the

43 333 effectiveness of the techniques?

44 334 The results have been used to design and adapt our tools (questionnaire, interview, and

45 335 observation grids, scorecards) and will be used for the initial development of middle-range

46 336 theories (stage 2). Review results will be presented in a separate paper.

47 337

1  
2  
3 338 ***Stage 2 – Data collection and elaboration of the initial middle-range theories***  
4  
5

6 339 Stage 2 involves data collection to appraise the outcomes, mechanisms, and contextual elements  
7  
8 340 (including the techniques). There will be two rounds of data collection. The first round of data  
9  
10 341 collection will help to elaborate initial middle-range theories (to establish how the intervention  
11  
12 342 works in context) together with the results of the literature analysis from stage 1. The second  
13  
14 343 round of data collection will contribute to verifying the initial theories (contribution analysis).  
15 344 Table 1 shows the variables that will be collected and the manner of collection.

16 345 To collect data, the following tools will be used:

- 17  
18 346 • A questionnaire to collect data on mechanisms and outcomes on pupils at T0 (1st round)  
19  
20 347 and T1 (2nd round).  
21

22  
23 348 It will contain: descriptive variables (gender, age, socio-professional category of parents);  
24  
25 349 questions on tobacco, alcohol, and cannabis use; a question relating to the “use of support  
26  
27 350 services”; questions related to knowledge and perception of tobacco, cannabis, and alcohol use;  
28  
29 351 and scales assessing peer pressure and life skills.

30 352 This questionnaire will be administrated twice, at T0 (i.e., at the end of September/beginning  
31  
32 353 of October 2019) and T1 (June 2022) to all pupils participating in the ERIEAS study. Table 2  
33  
34 354 lists the questions/scales and their previous use in other studies.

- 35 355 • Pupil interviews: (IP1&IP2)

36  
37 356 A total of 160 pupil interviews will be conducted during the study in two sessions.

- 38  
39 357 ○ The first session of non-directive interviews will be held in November/December  
40  
41 358 2019 (IP1). These interviews will collect contextual factors, mechanisms, and  
42  
43 359 outcomes on pupils (IP1), and help to elaborate the initial middle-range theories. In  
44  
45 360 the first academic year, two pupils per class will be randomly selected and  
46  
47 361 interviewed, until saturation (i.e., when the collected data do not add anything new  
48  
49 362 to the understanding of the research topic), meaning at least 80 pupils will be  
50  
51 363 surveyed.

52 364 These interviews will collect large amounts of information allowing the elaboration of the  
53  
54 365 second round of interviews with pupils (IP2) and assist the configuration and design of  
55  
56 366 a questionnaire including a Discrete Choice Experiment (DCE) set of questions.

- 57 367 ○ The second session of interviews will validate CMO configurations in pupils (IP2).  
58  
59 368 At the end of the second academic year (June 2021), a session of semi-directive  
60  
369 interviews with pupils will be held (80 pupils randomly selected, and different from

1  
2  
3 370 those of the previous session). This qualitative material may validate the framework  
4  
5 371 expressed through the initial middle-range theory (CMO configurations). For each  
6  
7 372 hypothesized configuration in the initial middle-range theories, there will be an  
8  
9 373 open-ended question that will not allow the respondent to be guided by the expected  
10  
11 374 answer (presence or absence of C and/or M).

12  
13 375 • Professionals' and EA session leaders' interviews (IE1& IE2)

14  
15 376 Semi-structured interviews with the education community and among the session leaders will  
16  
17 377 collect information on mechanisms and contextual factors related to school. Three session  
18  
19 378 leaders and three people per institution will be surveyed: a nurse, the headmaster, and a teacher  
20  
21 379 whose class is involved in the intervention. Interviews will be held twice: at the end of the first  
22  
23 380 academic year (June 2020) and at the end of the 3-year intervention period (June 2022). A total  
24  
25 381 of three session leaders and 30 professionals will therefore be interviewed at each session. In  
26  
27 382 total, 66 interviews will be performed.

28  
29 383 This first session of semi-directive interviews will help to elaborate the initial middle-range  
30  
31 384 theories, to design the second round of interviews (IE2), and to configure and design the DCE  
32  
33 385 questionnaire. The second session of semi-directive interviews may validate the framework  
34  
35 386 expressed through the initial middle-range theory.

36 387  
37 388 • Funders of the program interviews (IF).

38 389 Semi-directive interviews with funders of the program will collect information related to  
39  
40 390 context parameters (Ce exclusively). A total of three funders will be interviewed once, in  
41  
42 391 October 2019. These interviews will help to elaborate the initial middle-range theories.

43 392 • Observation of the sessions

44  
45 393 The objective is to collect the following contextual elements, specific to each institution: the  
46  
47 394 intervention climate within the institution and in each class, the reception given by the school  
48  
49 395 staff as a whole, the conditions of session delivery, the motivation levels of the session leaders  
50  
51 396 and teachers in attendance, and the characterization of the feedback and sharing sequences  
52  
53 397 (spatial organization, relations between pupils/session leaders/others).

54 398 Observations of at least two sessions per institution will be conducted in each academic year.  
55  
56 399 Twenty sessions per year will therefore be observed, making a total of 60 observations over the  
57  
58 400 3-year intervention period. Furthermore, the session leaders of non-observed sessions will  
59  
60 401 produce a report following a reporting grid.

1  
2  
3 402 Before the program starts (in mid-October 2019), each program presentation for the school staff  
4 403 has been observed, thus adding 10 observation sessions. A total of 70 observation sessions will  
5 404 therefore take place during the study.  
6  
7

8 405

- 9  
10 406 • Scorecard to collect institution characteristics (contextual elements, Ce)

11  
12 407 Data related to the characteristics of the institutions will be collected from the education  
13 408 authorities using a scorecard: level of urbanization of the town or city where the institution is  
14 409 located (urban, quasi-urban, quasi-rural, rural), the deprivation index of the school area (FDep  
15 410 index from Rey et al., 2009 [38]), the number of pupils, male/female ratio, number of repeaters  
16 411 per institution, the availability of a nurse, the type of institution (general/vocational, priority  
17 412 education areas), the proximity to a center for young substance users and its availability, where  
18 413 appropriate, the occurrence of occasional awareness campaigns on addiction in the institution,  
19 414 and having been previously involved in the EA program.  
20  
21  
22  
23  
24  
25

26 415

- 27  
28 416 • DCE questionnaire

29  
30 417 The questionnaire will have variables based on a stated-preference method [39], known as  
31 418 DCE [40]. It will enable us to gain a better understanding of the pathway and the circumstances  
32 419 and determinant combinations that could trigger initiation, maintenance, or re-engagement of  
33 420 consumption of alcohol, tobacco, and/or cannabis use. It may help to validate the final middle-  
34 421 range theories i.e. the CMO configurations.  
35  
36  
37  
38

39 422 Figure 3 presents the different modalities of data collection.

40 423 Figure 4 presents the data collection timelines.  
41  
42  
43

44 424

45 425 Survey instruments: questionnaires, interview guides, observation logs, and observation  
46 426 checklists have been designed, consistent with the results of literature analysis (stage 1) and  
47 427 will be pre-tested.  
48  
49

50 428

51 429 Using quantitative analyses, the following outcomes will be identified at baseline and after nine  
52 430 EA sessions:

- 53  
54 431 • Tobacco, alcohol, and cannabis use: current frequencies of tobacco, alcohol, and cannabis  
55 432 consumption (every day/week/month, rarely, never); number of episodes of heavy drinking  
56 433 (at least 5 drinks per occasion) in the last 7 days/30 days/12 months; number of episodes of  
57 434 drunkenness in the last 7 days/30 days/12 months.  
58  
59  
60



- 1  
2  
3 435 • Consultation with a healthcare professional to discuss problematic use of alcohol and/or  
4 436 tobacco and/or cannabis (number of times in the last 12 months).

7 437 At this stage, the literature review will have helped to identify some of the mechanisms and  
8 438 contextual elements that could lead to greater effectiveness of an intervention. These factors  
9 439 need to be confirmed during the second stage (i.e., seminar and elaboration of the initial middle-  
10 440 range theories). Here, we present the potential M and C we aim to investigate at this stage of  
11 441 the study:

- 16 442 • Representations and attitudes [41]: normative expectations or perceived norms about use,  
17 443 intentions, refusal and resistance skills, risk-related attitudes and behaviors, positive and  
18 444 negative beliefs about consequences, reasons to use, and perceived peer influence and  
19 445 friends' use.
- 24 446 • Life skills: ability to mobilize self-management skills (self-esteem, problem-solving  
25 447 abilities, reducing stress and anxiety), general social skills (overcoming shyness,  
26 448 communicating clearly, building relationships), and drug resistance skills (defenses against  
27 449 pressures to use alcohol and other drugs, identify the consequences of substance use, risk-  
30 450 taking, and the influences of the media).

33 451 Both of these mechanisms have been shown in the literature to be effective in terms of addiction  
34 452 prevention [7,8]. Here, we use the definition of Cambon et al.: “What characterizes and  
35 453 punctuates the process of change and hence, the production of outcomes”[16]. In this definition,  
36 454 a mechanism can be psychological (motivation, self-efficacy, self-control, skills, etc.) or social  
37 455 (values shared in a community, power sharing perception, etc.).  
41 456 Table 1 presents the details of the expected/ hypothesized contexts and mechanisms and the  
42 457 time and modalities of collection.

44 458

### 47 459 ***Stage 3 - Data analysis***

49 460 Data analysis will include analysis of each case (each school) and a cross-case analysis allowing  
50 461 us to compare and see potential effects of some contexts. The analysis will answer the question:  
51 462 In what contextual conditions and through which mechanisms does the EA program produce  
52 463 outcomes? The validation of initial middle-range theories (CMOs) will allow us to answer the  
53 464 question. This validation will combine and compare data from quantitative and qualitative  
54 465 analyses in monographs (analysis of each case (institution)) and by cross-case analysis (analysis  
55 466 comparing these cases). We will combine a QUAN/QUAL design [42] to use quantitative and

1  
2  
3 467 qualitative approaches in tandem, to provide new insights and a more refined approach. This  
4  
5 468 analysis will identify the recurrent CMOs that will therefore be replicable.

- 6  
7 469 • Quantitative data (from T0 and T1 questionnaires): Analyses of the evolution of  
8  
9 470 mechanisms and outcomes

10  
11 471 A first descriptive analysis will be conducted on the representations, mobilization of life skills,  
12  
13 472 tobacco, alcohol, and cannabis use, and the use of support services at each measurement point.  
14  
15 473 Trajectory modeling will be performed using latent class growth modeling to study changes in  
16  
17 474 representations, life skills, product use, and use of support services between the two  
18  
19 475 questionnaires. The analysis will be adjusted according to the characteristics of the pupils (age,  
20  
21 476 gender, socio-professional category of parents) and institutions (level of urbanization, index of  
22  
23 477 social disadvantage, number of pupils, male/female ratio, number of teacher per institution,  
24  
25 478 proximity to a center for young substance users/nurse availability, earlier involvement in the  
26  
27 479 EA program, involvement in occasional awareness campaigns on addiction, type of institution).  
28  
29 480 This analysis will enable verification of the program's impact in context across all the pupils  
30  
31 481 by studying the changes between the two collection times (i.e., before and after nine sessions  
32  
33 482 of EA). As some of the variables used here are the same as for the Life skills Training ST [43]  
34  
35 483 and Unplugged [13] programs, the findings will be compared and contrasted with these  
36  
37 484 programs conducted in the Nouvelle-Aquitaine region.

- 38  
39 485  
40  
41 486 • Qualitative data

42  
43 487 The qualitative data can be divided in two groups (i.e., for the two rounds), with different uses  
44  
45 488 and aims. The first interview sessions and observations (i.e., IP1, IF, IE1, scorecard and first  
46  
47 489 observations) will be utilized to set the frame of the initial middle-range theories. Following  
48  
49 490 this first set of qualitative investigations, a 2-day seminar will be organized to set out the initial  
50  
51 491 middle-range theories. The aim of this seminar will be to discuss the findings of the literature  
52  
53 492 review and the first round of data collection. This seminar will be interdisciplinary, and will  
54  
55 493 involve epidemiologists, prevention experts, addiction experts, psychiatrists, psychologists,  
56  
57 494 sociologists, EA session leaders, and Coreadd staff. Drawing on the participants' experiences,  
58  
59 495 the literature review, the observations, and the interviews, the seminar will enable us to set out  
60  
496 hypotheses about the mechanisms (M) linking Ci and Ce to the outcomes.

497 The second set of qualitative investigations (i.e., IP2, IE2 and lasts observations) will be utilized  
498 to validate the final middle-range theories.

1  
2  
3 499 All the qualitative data (i.e., data collected from pupils, funders, professionals' interviews, and  
4 observations) will be examined by content analysis [44], which refers to "a set of techniques  
5 500 for systematically and objectively analyzing and describing the content of communication. The  
6 501 aim is to obtain indicators allowing inferences to be made about the messages and how they are  
7 502 produced and received (inferred variables)". Content analysis encodes, classifies, and ranks the  
8 503 communications to examine patterns, trends, or distinguishing features; in our case, the  
9 504 recurrence of C-M-O configurations in each case (institution) and by cross-case analysis.  
10 505  
11 506

- 17 507 • Quantitative data from DCE questionnaires: analyses of DCE questionnaires

18 508 A DCE will be used to: i) understand combinations of circumstances and determinants that  
19 509 impact the decisions of teenagers to start substance use and/or prevent them from cessation  
20 510 and/or lead them to relapse; ii) validate CMO configurations.

21 511 All previous materials collected and analyzed will be utilized to identify attributes and potential  
22 512 scenarios.

23 513 The DCE will allow quantification of the weights individuals attach to various attributes of a  
24 514 situation to finally predict their independent impacts on decisions. In other words, the DCE  
25 515 approach will allow analysis of individual stated preferences in response to hypothetical choices  
26 516 and will enable estimation of the relative importance of each level of attribute during the  
27 517 decision-making process. When presented with hypothetical options (i.e., choice scenarios) that  
28 518 describe alternative specifications of a situation, it is assumed respondents will choose the  
29 519 behavior that they would most likely adopt. The higher a respondent's preference for a certain  
30 520 attribute level, the more likely they are to choose that scenario over any alternative. This method  
31 521 will allow the researcher to highlight situations and configurations allowing the implementation  
32 522 of life skills. Mixed logit models will be used to establish whether the attributes' levels  
33 523 presented in the scenarios are statistically significant predictors of adolescents' choices.

34 524

- 48 525 • Combination of quantitative and qualitative data

49 526 The ERIEAS study will combine quantitative and qualitative methods to achieve mixed  
50 527 methods research. This study has a multiphase design with first data collection combining  
51 528 QUAN (T0) + QUAL (i.e., IP1, IF, IE1, scorecard and firsts observations). These first data will  
52 529 contribute to and guide a second qualitative phase (i.e., IP2, IE2) and the DCE questionnaire  
53 530 elaboration by identifying some C, M, O and, possibly, certain configurations for investigation.  
54 531 This design seemed to be particularly relevant as it allows flexibility to address a set of research  
55 532 questions that will arise from the separate parts of the study.

1  
2  
3 533 The CMO configurations obtained from the qualitative data will be compared with those  
4  
5 534 obtained from the DCE questionnaire. All these CMO configurations will be discussed during  
6  
7 535 a 1-day seminar in stage 4, which will lead to a complete analysis of the EA complex  
8  
9 536 intervention.

10 537

11  
12 538 ***Stage 4 - Refinement and adjustment of the middle-range theories, and definition of the***  
13  
14 539 ***program's key functions***

15  
16 540 The different modalities of investigation and analysis will allow us to progressively refine the  
17  
18 541 middle-range theories. We will compare the primary theories with the CMO configurations  
19  
20 542 observed in each institution and the recurrent CMOs to consolidate and adjust the initial middle-  
21  
22 543 range theories. Furthermore, the DCE questionnaire will allow the research team to formulate  
23  
24 544 strong hypotheses about the triggers involved in initiating, maintaining, or re-engaging in  
25  
26 545 consumption of alcohol, tobacco, and/or cannabis among adolescents and the impact of the EA  
27  
28 546 intervention.

29 547 The material will be synthesized and used to refine and adjust the final middle-range theories  
30  
31 548 and the program's key functions. This work will be conducted during a second seminar (1 day)  
32  
33 549 with the whole project team, i.e., the researchers, EA professionals, and Coreadd staff members.

34 550

35 551 The team will carry out the following activities:

- 36  
37 552 • Definition of the EA program's key functions (configurations underpinning the program's  
38  
39 553 success).
- 40  
41 554 • Comparison with the elements used in other addiction prevention programs designed to  
42  
43 555 develop life skills, such as the LST program [43] and Unplugged [13].
- 44  
45 556 • Exploration of further strategies to complete the EA program wherever this is necessary to  
46  
47 557 ensure optimal outcomes.
- 48  
49 558 • Drafting of detailed recommendations 1) to scale-up the EA program's key functions to  
50  
51 559 other areas with other stakeholders, and 2) for a quasi-experimental large-scale evaluation  
52  
53 560 of the program (where only the key functions will be retained and freely adapted) if required  
54  
55 561 (judgment criteria may not be precisely determined at this stage).

56  
57 562

58  
59 563 **ETHICS AND DISSEMINATION**

1  
2  
3 564

4  
5 565 This article describes a protocol using a realist design to understand how an innovative  
6 566 prevention program works, and what contexts, mechanisms, and outcomes are involved in this  
7  
8 567 intervention. Realist evaluation is a valuable approach that highlights the triggers of an  
9  
10 568 intervention and guides its transferability.

11  
12 569

13 570 The project will be carried out in full accord with current relevant legislation (e.g., the Charter  
14 571 of Fundamental Rights of the EU) and international conventions (e.g., Declaration of Helsinki).  
15  
16 572 It follows the relevant French legislation on interventional research protocols involving the  
17 573 human person (Jardé law, category 3 research on prospective data). The methods development,  
18  
19 574 data collection, and analysis will take into account the following issues:

- 20  
21  
22 575 • Anonymity of study respondents will be preserved and ensured at all times. Unnecessary  
23  
24 576 collection of personal data will be avoided, and respondents will have the right to review  
25  
26 577 outputs and withdraw consent. All personal data will be coded, removed from the data for  
27  
28 578 analysis and stored separately. Only designated research staff will have access to the keys  
29  
30 579 linking the data with the personal information.
- 31  
32 580 • Information regarding the study and the right to refuse to participate will be distributed to  
33  
34 581 all study participants and their parents or guardians and, in the case of refusal, alternative  
35  
36 582 means of data collection will be explored (e.g., alternative respondents).

37 583 The protocol was approved by the Comité et Protection des Personnes (CPP) i.e., Committee  
38 584 for the Protection of Persons CPP SUD-EST VI No. AU 1525 and was reported to the Agence  
39  
40 585 Française de Sécurité Sanitaire des Produits de Santé (ANSM) i.e., the French National Agency  
41  
42 586 for the Safety of Health Products. It is in compliance with reference methodology MR003 of  
43  
44 587 Bordeaux University Hospital (CNIL No. 2026779v0).

45  
46 588 This research has been registered on ClinicalTrials.gov (No. NCT04110626).

47  
48 589 The research project is registered in the European database ID-RCB (No. 2019-A01003-54).

49 590 This research has received funding from a national recognized research agency; the INCa. This  
50  
51 591 funding has been obtained via a national competitive peer review grant application process,  
52  
53 592 named “2018 Call for projects- Population health intervention research: Addressing all  
54  
55 593 dimensions of cancer control”.

56 594

57  
58 595 From a research viewpoint, our proposed methodology is consistent with the bottom-up  
59  
60 596 approaches advocated in health promotion, starting with a real-world response to a pressing

1  
2  
3 597 problem [45]. As this approach allows better reflection of stakeholders' views and concerns,  
4  
5 598 and makes external validity workable, it therefore becomes a preferable alternative for  
6  
7 599 evaluation of health promotion or programs [45]. Our study is a realist evaluation based on a  
8  
9 600 natural experiment mobilizing mixed-model methods and a preference stated method.  
10  
11 601 Therefore, it is an innovative way of studying the process of a complex intervention [46]. Due  
12  
13 602 to its specific methodology and large sample size, this study will provide strong and detailed  
14  
15 603 information regarding consumption of tobacco, alcohol, and cannabis among young people and  
16  
17 604 their representations of the consumption of these products. Utilizing the stated preference  
18  
19 605 methods, this study will highlight how pupils use their competences and life skills in relation  
20  
21 606 to addictive products.

22  
23 607 Our study has some limitations related to its design. First, even if our study provides insights  
24  
25 608 into pupils' behaviors before and after the intervention it will not allow us to take into account  
26  
27 609 all factors that may play a part in the consumption of psychotropic agents in adolescence.  
28  
29 610 Nevertheless, the two rounds of quantitative data acquisition and the large amount of qualitative  
30  
31 611 data collected will provide a better understanding of how such an intervention could have an  
32  
33 612 impact on consumption and perceptions regarding psychotropic agents. Second, our results are  
34  
35 613 declarative and the ERIEAS study will not use any kind of biological or medical information.  
36  
37 614 Even if declarative data could lead to underestimation, the use of an auto-administered  
38  
39 615 questionnaire on drug consumption would reduce this under-declaration [47].

40  
41 616 Tobacco, alcohol, and cannabis consumption among adolescents constitute a worrying trend,  
42  
43 617 especially in France [48–51], and interventions aimed at prevention should be tailored to this  
44  
45 618 specific population. This study will explain and pinpoint the precise impacts of the EA program  
46  
47 619 and the conditions for this impact. It will allow definition of the EA program's key functions  
48  
49 620 and how they work in different contexts and, possibly, how they could be adapted in form. We  
50  
51 621 will be able to compare and contrast the program with other programs being implemented in  
52  
53 622 France, with a view to creating fine adjustments of solutions for optimal outcomes. Finally,  
54  
55 623 guidelines will be set out, to implement EA elsewhere. The conclusions will be highly  
56  
57 624 replicable and offer a basis for designing other interventions using identified key functions. We  
58  
59 625 will publish different papers describing the addictive behaviors of this population, and then go  
60  
61 626 on to analyze the impacts and key functions of the EA program. We will eventually focus on  
62  
63 627 what triggers consumption of psychotropic agents among young people exposed to a prevention  
64  
65 628 program. Finally, a report on the study will provide health authorities with evidence-based  
66  
67 629 results to help with the rollout of health promotion policies in schools. In conclusion, this  
68  
69  
70

1  
2  
3 630 project will be of great interest to policy-makers, authorities, and field professionals involved  
4  
5 631 in the substance use prevention and health promotion sector.

6 632 Figure legends:

7  
8 633 **Figure 1: The realistic approach and the way to refine middle range theories applied to ERIEAS study.**

9  
10 634 **Figure 2: Stages of the ERIEAS study**

11  
12 635 **Figure 3: Different modalities of data collection and their links with the middle-range theories**

13  
14 636 **Figure 4: Timeline of the data collection**

15  
16 637

17 638  
18  
19  
20  
21  
22  
23  
24  
25  
26  
27  
28  
29  
30  
31  
32  
33  
34  
35  
36  
37  
38  
39  
40  
41  
42  
43  
44  
45  
46  
47  
48  
49  
50  
51  
52  
53  
54  
55  
56  
57  
58  
59  
60

## 639 REFERENCES

- 640 1 Gowing LR, Ali RL, Allsop S, *et al.* Global statistics on addictive behaviours: 2014 status  
641 report. *Addiction* 2015;**110**:904–19. doi:10.1111/add.12899
- 642 2 Brick J. *Handbook of the Medical Consequences of Alcohol and Drug Abuse*. Routledge  
643 2012.
- 644 3 Barker D. *Mothers, Babies, and Disease in Later Life*. 2nd ed. London, UK: : BMJ  
645 Publishing Group 1998.
- 646 4 Schmits E, Mathys C, Quertemont E. A longitudinal study of cannabis use initiation  
647 among high school students: Effects of social anxiety, expectancies, peers and alcohol.  
648 *Journal of Adolescence* 2015;**41**:43–52. doi:10.1016/j.adolescence.2015.02.009
- 649 5 Meruelo AD, Castro N, Cota CI, *et al.* Cannabis and alcohol use, and the developing  
650 brain. *Behavioural Brain Research* 2017;**325**:44–50. doi:10.1016/j.bbr.2017.02.025
- 651 6 Lorenzetti V, Alonso-Lana S, Youssef GJ, *et al.* Adolescent Cannabis Use: What is the  
652 Evidence for Functional Brain Alteration? *Curr Pharm Des* 2016;**22**:6353–65.  
653 doi:10.2174/1381612822666160805155922
- 654 7 WHO. Skills for health: Skills-based health education including life skills: An important  
655 component of a child-friendly/ health-promoting school. Geneva: WHO, 88 p. 2003.  
656 [http://www.who.int/school\\_youth\\_health/media/en/sch\\_skills4health\\_03.pdf](http://www.who.int/school_youth_health/media/en/sch_skills4health_03.pdf)
- 657 8 Griffin KW, Botvin GJ. Evidence-Based Interventions for Preventing Substance Use  
658 Disorders in Adolescents. *Child Adolesc Psychiatr Clin N Am* 2010;**19**:505–26.  
659 doi:10.1016/j.chc.2010.03.005
- 660 9 Faggiano F, Vigna-Taglianti FD, Versino E, *et al.* School-based prevention for illicit  
661 drugs use: A systematic review. *Preventive Medicine* 2008;**46**:385–96.  
662 doi:10.1016/j.ypmed.2007.11.012
- 663 10 Fanshawe TR, Halliwell W, Lindson N, *et al.* Tobacco cessation interventions for young  
664 people. *Cochrane Database Syst Rev* 2017;**11**:CD003289.  
665 doi:10.1002/14651858.CD003289.pub6
- 666 11 Stockings E, Hall WD, Lynskey M, *et al.* Prevention, early intervention, harm reduction,  
667 and treatment of substance use in young people. *The Lancet Psychiatry* 2016;**3**:280–96.  
668 doi:10.1016/S2215-0366(16)00002-X
- 669 12 Botvin GJ, Griffin KW. Life skills training as a primary prevention approach for  
670 adolescent drug abuse and other problem behaviors. *Int J Emerg Ment Health* 2002;**4**:41–  
671 7.
- 672 13 Vadrucchi S, Vigna-Taglianti FD, van der Kreeft P, *et al.* The theoretical model of the  
673 school-based prevention programme Unplugged. *Glob Health Promot* 2016;**23**:49–58.  
674 doi:10.1177/1757975915579800



- 1  
2  
3 675 14 Groupement Romand d'Etudes des Addictions. Programme In Media.  
4 676 2018.[https://www.grea.ch/evenements/in-medias-animer-un-atelier-de-dialogue-](https://www.grea.ch/evenements/in-medias-animer-un-atelier-de-dialogue-philosophique-2014-03-04)  
5 677 [philosophique-2014-03-04](https://www.grea.ch/evenements/in-medias-animer-un-atelier-de-dialogue-philosophique-2014-03-04) (accessed 16 Jul 2018).  
6  
7 678 15 Botvin GJ, Griffin KW. Life skills training: Empirical findings and future directions.  
8 679 *Journal of primary prevention* 2004;**25**:211–232.  
9  
10 680 16 Cambon L, Terral P, Alla F. From intervention to interventional system: towards greater  
11 681 theorization in population health intervention research. *BMC Public Health* 2019;**19**:339.  
12 682 doi:10.1186/s12889-019-6663-y  
13  
14 683 17 Wong G, Westhorp G, Manzano A, *et al.* RAMESES II reporting standards for realist  
15 684 evaluations. *BMC Medicine* 2016;**14**:96. doi:10.1186/s12916-016-0643-1  
16  
17 685 18 Yin RK. *Case Study Research: Design and Methods*. 5th Revised edition. Thousand  
18 686 Oaks, CA: : SAGE Publications Inc 2014.  
19  
20 687 19 Koenig G. Realistic Evaluation and Case Studies: Stretching the Potential. *Evaluation*  
21 688 2009;**15**:9–30. doi:10.1177/1356389008097869  
22  
23 689 20 Chen H-T. *Theory-driven evaluations*. Newbury Park, CA: : Sage Publications 1990.  
24  
25 690 21 Stame N. Theory-Based Evaluation and Types of Complexity. *Evaluation* 2004;**10**:58–76.  
26 691 doi:10.1177/1356389004043135  
27  
28 692 22 Weiss C. *Theory-based evaluation: Past, present, and future*. *New Dir Eval. sept*  
29 693 *1997;1997(76):41-55*.  
30  
31 694 23 De Silva MJ, Breuer E, Lee L, *et al.* Theory of Change: a theory-driven approach to  
32 695 enhance the Medical Research Council's framework for complex interventions. *Trials*  
33 696 2014;**15**:267. doi:10.1186/1745-6215-15-267  
34  
35 697 24 Mayne J. Addressing Attribution through Contribution Analysis: Using Performance  
36 698 Measures Sensibly | Better Evaluation. *The Canadian Journal of Program Evaluation*.  
37 699 2001;:1–24.  
38  
39 700 25 Mayne J. Contribution analysis: Coming of age? *Evaluation* 2012;**18**:270–80.  
40 701 doi:10.1177/1356389012451663  
41  
42 702 26 Craig P, Cooper C, Gunnell D, *et al.* Using natural experiments to evaluate population  
43 703 health interventions: new MRC guidance. *J Epidemiol Community Health* 2012;**66**:1182–  
44 704 6. doi:10.1136/jech-2011-200375  
45  
46 705 27 Pawson R, Tilley N. *Realistic Evaluation*. SAGE Publications 1997.  
47  
48 706 28 Pawson R, Greenhalgh T, Harvey G, *et al.* Realist review--a new method of systematic  
49 707 review designed for complex policy interventions. *J Health Serv Res Policy* 2005;**10**  
50 708 **Suppl 1**:21–34. doi:10.1258/1355819054308530  
51  
52 709 29 Blaise P, Marchal B, Lefèvre P, *et al.* Au-delà des méthodes expérimentales: l'approche  
53 710 réaliste en évaluation. Published Online First:  
54 711 2010.<http://dspace.itg.be/handle/10390/6932>

- 1  
2  
3 712 30 Salter KL, Kothari A. Using realist evaluation to open the black box of knowledge  
4 713 translation: a state-of-the-art review. *Implement Sci* 2014;**9**:115. doi:10.1186/s13012-014-  
5 714 0115-y
- 7 715 31 Pawson R. *Evidence Based Policy: A Realist Perspective*. SAGE Publications Ltd. 2006.
- 9 716 32 Hawe P, Shiell A, Riley T. Complex interventions: how “out of control” can a  
10 717 randomised controlled trial be? *BMJ* 2004;**328**:1561–3. doi:10.1136/bmj.328.7455.1561
- 12 718 33 Hawe P, Shiell A, Riley T. Theorising Interventions as Events in Systems. *Am J*  
13 719 *Community Psychol* 2009;**43**:267–76. doi:10.1007/s10464-009-9229-9
- 15 720 34 Cambon L, Minary L, Ridde V, *et al.* Transferability of interventions in health education:  
16 721 a review. *BMC Public Health* 2012;**12**:497. doi:10.1186/1471-2458-12-497
- 18 722 35 Cambon L, Minary L, Ridde V, *et al.* A tool to analyze the transferability of health  
19 723 promotion interventions. *BMC Public Health* 2013;**13**:1184. doi:10.1186/1471-2458-13-  
20 724 1184
- 22 725 36 Ridde V, Robert E, Guichard A, *et al.* L’approche réaliste à l’épreuve du réel de  
23 726 l’évaluation des programmes. *The Canadian Journal of Program Evaluation* 2011;**26**:37.
- 25 727 37 Lacouture A, Breton E, Guichard A, *et al.* The concept of mechanism from a realist  
26 728 approach: a scoping review to facilitate its operationalization in public health program  
27 729 evaluation. *Implement Sci* 2015;**10**:153. doi:10.1186/s13012-015-0345-7
- 29 730 38 Rey G, Jouglu E, Fouillet A, *et al.* Ecological association between a deprivation index and  
30 731 mortality in France over the period 1997 - 2001: variations with spatial scale, degree of  
31 732 urbanicity, age, gender and cause of death. *BMC Public Health* 2009;**9**:33.  
32 733 doi:10.1186/1471-2458-9-33
- 34 734 39 Ryan M, Bate A, Eastmond CJ, *et al.* Use of discrete choice experiments to elicit  
35 735 preferences. *BMJ Quality & Safety* 2001;**10**:i55–60. doi:10.1136/qhc.0100055..
- 37 736 40 Mandeville KL, Lagarde M, Hanson K. The use of discrete choice experiments to inform  
38 737 health workforce policy: a systematic review. *BMC Health Services Research*  
39 738 2014;**14**:367. doi:10.1186/1472-6963-14-367
- 41 739 41 Giannotta F, Vigna-Taglianti F, Rosaria Galanti M, *et al.* Short-Term Mediating Factors  
42 740 of a School-Based Intervention to Prevent Youth Substance Use in Europe. *Journal of*  
43 741 *Adolescent Health* 2014;**54**:565–73. doi:10.1016/j.jadohealth.2013.10.009
- 45 742 42 Creswell J, Plano Clark v. *Designing and Conducting Mixed Methods Research (3rd ed.)*.  
46 743 3rd ed. SAGE Publications 2017. [https://www.ebooks.com/en-us/95777772/designing-](https://www.ebooks.com/en-us/95777772/designing-and-conducting-mixed-methods-research/john-w-creswell-vicki-l-plano-clark/)  
47 744 [and-conducting-mixed-methods-research/john-w-creswell-vicki-l-plano-clark/](https://www.ebooks.com/en-us/95777772/designing-and-conducting-mixed-methods-research/john-w-creswell-vicki-l-plano-clark/) (accessed  
48 745 18 Nov 2019).
- 50 746 43 Velasco V, Griffin KW, Botvin GJ, *et al.* Preventing Adolescent Substance Use Through  
51 747 an Evidence-Based Program: Effects of the Italian Adaptation of Life Skills Training.  
52 748 *Prevention Science* 2017;**18**:394–405. doi:10.1007/s1121-017-0776-2
- 54  
55  
56  
57  
58  
59  
60

- 1  
2  
3 749 44 Bardin L. L'analyse de contenu. 2nd edition. Paris: PUF; 2013.  
4 750 2018.[https://www.puf.com/content/L\\_analyse\\_de\\_contenu](https://www.puf.com/content/L_analyse_de_contenu) (accessed 9 Sep 2018).  
5  
6 751 45 Chen HT. The bottom-up approach to integrative validity: a new perspective for program  
7 752 evaluation. *Eval Program Plann* 2010;**33**:205–14.  
8 753 doi:10.1016/j.evalprogplan.2009.10.002  
9  
10 754 46 Moore GF, Audrey S, Barker M, *et al.* Process evaluation of complex interventions:  
11 755 Medical Research Council guidance. *BMJ* 2015;**350**:h1258.  
12  
13 756 47 Beck F, Godeau E, Legleye S, *et al.* [Drug consumptions by the young adolescents:  
14 757 epidemiological data.]. *médecine/sciences* 2007;**23**:1162–8.  
15  
16 758 48 OFDT. Drogues et addictions, Données essentielles. Paris: 2019.  
17  
18 759 49 European Monitoring Centre for Drugs and Drug Addiction. European drug report 2019:  
19 760 trends and developments. Lisbon: : Office for Official Publications of the European  
20 761 Communities 2019. <http://www.emcdda.europa.eu/publications/edr/trends->  
21 762 [developments/2019](http://www.emcdda.europa.eu/publications/edr/trends-developments/2019)  
22  
23 763 50 Spilka S, Godeau E, Le Nézet O, *et al.* Usages d'alcool, de tabac et de cannabis chez les  
24 764 adolescents du secondaire en 2018. *Tendances* 2019;**132**.  
25  
26 765 51 Le Nézet O, Janssen E, Brissot A, *et al.* Les comportements tabagiques à la fin de  
27 766 l'adolescence. Enquête Escapad 2017. *Bull épidémiol hebd* 2018;**14**:274.  
28  
29  
30  
31  
32  
33  
34  
35  
36  
37  
38  
39  
40  
41  
42  
43  
44  
45  
46  
47  
48  
49  
50  
51  
52  
53  
54  
55  
56  
57  
58  
59  
60

1  
2  
3 769 **Data statement**

4  
5 770 Not applicable

6  
7 771

8  
9  
10 772 **Authors' contribution**

11  
12  
13 773 JMF and AA drafted this article and all authors revised the manuscript. The project design was developed by LC.

14  
15 774 JMF, AA, EM, RG, MT, LM, LM, VD and FA were involved in implementing the project and in developing the

16  
17 775 evaluation design, under the supervision of LC. All authors read and approved the final manuscript.

18  
19  
20 776 **Acknowledgements**

21  
22  
23 777 The authors are very grateful to all those who took part in the project.

24  
25  
26 778 **Funding statement**

27  
28  
29 779 This research has received funding from a national recognized research agency; the INCa. This funding has been

30  
31 780 obtained *via* a national competitive peer review grant application process, named “2018 Call for projects-

32  
33 781 *Population health intervention research: Addressing all dimensions of cancer control*” (No. CAMBON-2019-

34  
35 782 008).

36  
37  
38 783 **Competing interests**

39  
40  
41 784 The authors declare that they have no competing interests.

42  
43 785

44  
45 786

46  
47 787 **LIST OF ABBREVIATIONS**

48  
49 788 ANSM: “Agence Française de Sécurité Sanitaire des Produits de Santé”; the French National Agency for the

50  
51 789 Safety of Health Products

52  
53 790 ARIA: “Association Ressources et Initiatives Addictions”; Association for initiatives and resources addictions

54  
55 791 Coreadd: Regional coordination for addiction prevention

56  
57 792 Ce : Contextual factor not linked to the intervention

58  
59 793 Ci : Contextual factor linked to the intervention

60  
794 CMO: Context – Mechanism – Outcomes

- 1  
2  
3 795 CPP: “Comité de Protection des Personnes”; Committee for the Protection of Person  
4  
5 796 DCE : Discrete choice experiment  
6  
7 797 EA: “Expériences Animées”; animated experiences  
8  
9 798 ERIEAS: “Evaluation Réaliste de l’Intervention Expériences Animées en milieu Scolaire”; Realist evaluation of  
10  
11 799 the EA intervention in schools  
12  
13 800 LST: Life skills training  
14  
15 801 TDE: Theory driven evaluation  
16  
17 802  
18  
19 803  
20  
21 804  
22  
23  
24  
25 805  
26  
27  
28  
29  
30  
31  
32  
33  
34  
35  
36  
37  
38  
39  
40  
41  
42  
43  
44  
45  
46  
47  
48  
49  
50  
51  
52  
53  
54  
55  
56  
57  
58  
59  
60

806

807

808 **Table 1: Mechanisms data (M) expected and time of collection**

809

| MECHANISMS                                                                       |                                                                                                                                                                                                                                                                                                                                                                                                                                                                                                                                                                           |                                           |                                                                 |                                                                                                        |
|----------------------------------------------------------------------------------|---------------------------------------------------------------------------------------------------------------------------------------------------------------------------------------------------------------------------------------------------------------------------------------------------------------------------------------------------------------------------------------------------------------------------------------------------------------------------------------------------------------------------------------------------------------------------|-------------------------------------------|-----------------------------------------------------------------|--------------------------------------------------------------------------------------------------------|
| Mechanisms                                                                       | Variables                                                                                                                                                                                                                                                                                                                                                                                                                                                                                                                                                                 | Data collection                           | Time collection                                                 | Population                                                                                             |
| Representations about drinking, tobacco and cannabis use; and what influences it | <ul style="list-style-type: none"> <li>• Representations about drinking, tobacco and cannabis use</li> <li>• The role of social influence on consumption (initiation and use)</li> <li>• The short-term effects of use and abuse</li> <li>• User rates among adolescents</li> <li>• Portrayal of drinking, tobacco and cannabis use: parties, fitting in, being accepted</li> <li>• Social acceptability of drinking, tobacco and cannabis use</li> <li>• The role of peers</li> <li>• The role of the media in encouraging alcohol, tobacco and cannabis use.</li> </ul> | Non-directive interviews (IP 1+IP2) (160) | During the 2 first academic years (September 2019 to June 2021) | At least 80 pupils the first 2 years randomly selected (i.e. 2 per class and 8 per establishment/year) |
|                                                                                  |                                                                                                                                                                                                                                                                                                                                                                                                                                                                                                                                                                           | Questionnaires T0, T1                     | September 2019 and June 2022                                    | Q : 1000 pupils / wave                                                                                 |

|                                                                                                                                  |                                                                                                                                                                                                                                                                                                                                                                                                                                                      |                                          |                                                                 |                                                                                                        |
|----------------------------------------------------------------------------------------------------------------------------------|------------------------------------------------------------------------------------------------------------------------------------------------------------------------------------------------------------------------------------------------------------------------------------------------------------------------------------------------------------------------------------------------------------------------------------------------------|------------------------------------------|-----------------------------------------------------------------|--------------------------------------------------------------------------------------------------------|
| Life skills for preventing addiction including tobacco, alcohol and cannabis use, and activated / mobilized through the sessions | <ul style="list-style-type: none"> <li>Personal self-management skills : self-esteem, problem-solving abilities, reducing stress and anxiety</li> <li>General social skills: overcoming shyness, communicating clearly, building relationships</li> <li>Drug resistance skills: defenses against pressure to use alcohol, cannabis and other drugs, identify the consequence of substance use, risk-taking and the influence of the media</li> </ul> | Non-directive interviews (IP1+IP2) (160) | During the 2 first academic years (September 2019 to June 2021) | At least 80 pupils the first 2 years randomly selected (i.e. 2 per class and 8 per establishment/year) |
|                                                                                                                                  |                                                                                                                                                                                                                                                                                                                                                                                                                                                      | Questionnaires T0, T1                    | September 2019 and June 2022                                    | 1000 pupils / wave                                                                                     |

**Contextual data (related to *Expériences Animées* intervention - Ci)**

| Variables                                                                                                                                                                                                                                                                       | Data collection                          | Time collection                                                 | Population                                                                                             |
|---------------------------------------------------------------------------------------------------------------------------------------------------------------------------------------------------------------------------------------------------------------------------------|------------------------------------------|-----------------------------------------------------------------|--------------------------------------------------------------------------------------------------------|
| <ul style="list-style-type: none"> <li>Intervention climate within the establishment</li> <li>Conditions of session delivery</li> <li>Characterization of the feedback and sharing sequences (spatial organization, relations between pupils/session leaders/others)</li> </ul> | Non-directive interviews (IP1+IP2) (160) | During the 2 first academic years (September 2019 to June 2021) | At least 80 pupils the first 2 years randomly selected (i.e. 2 per class and 8 per establishment/year) |

1  
2  
3  
4  
5  
6  
7  
8  
9  
10  
11  
12  
13  
14  
15  
16  
17  
18  
19  
20  
21  
22  
23  
24  
25  
26  
27  
28  
29  
30  
31  
32  
33  
34  
35  
36  
37  
38  
39  
40  
41  
42  
43  
44  
45  
46

|                                                                                                                                                                                                                                                                              |                                                                     |                             |                                                                                                                                                                                                           |            |
|------------------------------------------------------------------------------------------------------------------------------------------------------------------------------------------------------------------------------------------------------------------------------|---------------------------------------------------------------------|-----------------------------|-----------------------------------------------------------------------------------------------------------------------------------------------------------------------------------------------------------|------------|
| <ul style="list-style-type: none"> <li>Intervention climate within the establishment</li> <li>Reception given by the school staff as a whole</li> <li>Conditions of session delivery</li> <li>Motivation levels of the session leaders and teachers in attendance</li> </ul> | Observations (70)                                                   | September 2019 to June 2022 | Program presentation for the school staff when the program starts (1 presentation per establishment)<br>And at least 2 observation sessions per establishment and per year                                |            |
| <ul style="list-style-type: none"> <li>Characterization of the feedback and sharing sequences (spatial organization, relations between pupils/session leaders/others)</li> </ul>                                                                                             | Reports by session leaders for those sessions that are not observed |                             | Reports for all the sessions that are not observed                                                                                                                                                        |            |
|                                                                                                                                                                                                                                                                              | Semi-structured interviews (IE1+IE2) (66 interviews at all)         | June 2020 and June 2022     | 3 education professionals per establishment (the nurse, the headmaster, a teacher whose class is involved in the intervention) (30 interviews) and 3 session leaders: the same people in 2020 and in 2022 |            |
| <b>Contextual data (operational setting - Ce)</b>                                                                                                                                                                                                                            |                                                                     |                             |                                                                                                                                                                                                           |            |
| Public                                                                                                                                                                                                                                                                       | Variables                                                           | Data collection             | Time collection                                                                                                                                                                                           | Population |



|                                                                                           |                                             |                                                                                                                                                                                                                                                                                                               |                                                             |                                                                 |                                                                                                                                                                                                            |
|-------------------------------------------------------------------------------------------|---------------------------------------------|---------------------------------------------------------------------------------------------------------------------------------------------------------------------------------------------------------------------------------------------------------------------------------------------------------------|-------------------------------------------------------------|-----------------------------------------------------------------|------------------------------------------------------------------------------------------------------------------------------------------------------------------------------------------------------------|
| 1<br>2<br>3<br>4<br>5<br>6<br>7<br>8<br>9<br>10<br>11<br>12<br>13<br>14<br>15<br>16<br>17 | Pupils                                      | Characteristics <ul style="list-style-type: none"> <li>• Acceptability</li> <li>• Acceptation of the intervention</li> <li>• Their role in it, support or not toward the intervention</li> <li>• Opinion about the intervention and its effects on pupils</li> </ul> Facilitating/ limiting factors of change | Non-directive interviews (IP1+IP2) (160)                    | During the 2 first academic years (September 2019 to June 2021) | At least 80 pupils the first 2 years randomly selected (i.e. 2 per class and 8 per establishment/year)                                                                                                     |
| 18<br>19<br>20<br>21<br>22<br>23<br>24<br>25<br>26<br>27<br>28<br>29<br>30<br>31          | Session leaders and education professionals | Characteristics <ul style="list-style-type: none"> <li>• Acceptability</li> <li>• Acceptation of the intervention</li> <li>• Their role in it, support or not toward the intervention</li> </ul> Opinion about the intervention and its effects on pupils                                                     | Semi-structured interviews (IE1+IE2) (66 interviews at all) | June 2020/2022                                                  | 3 education professionals per establishment (the nurse, the headmaster, a teacher whose class is involved in the intervention) (30 interviews) and 3 session leaders : the same people in 2020 and in 2022 |
| 32<br>33<br>34<br>35<br>36<br>37<br>38<br>39<br>40                                        | Establishments                              | Characteristics <ul style="list-style-type: none"> <li>• Type of establishment (general/vocational, priority education areas – yes/no-)</li> </ul>                                                                                                                                                            | Scorecard from the education authorities                    | September 2019                                                  | Every establishment included in <i>Expériences Animées</i>                                                                                                                                                 |

1  
2  
3  
4  
5  
6  
7  
8  
9  
10  
11  
12  
13  
14  
15  
16  
17  
18  
19  
20  
21  
22  
23  
24  
25  
26  
27  
28  
29  
30  
31  
32  
33  
34  
35  
36  
37  
38  
39  
40  
41  
42  
43  
44  
45  
46

- 
- Level of urbanization of the town or city where the establishment is located
  - Deprivation index of the school area
  - Number of pupils, male/female ratio, number of repeaters per establishment
  - Proximity to a center for young substance users and availability rate where appropriate
  - Availability rate of the nurse
  - Establishments already involved in *Expériences Animées* in previous years (yes/no)
- Occasional awareness campaigns on addiction in the establishment (yes/no)
- 

|                                    |                                                                                                                                                                                                                                                                                                                         |                                     |                |                                                                      |
|------------------------------------|-------------------------------------------------------------------------------------------------------------------------------------------------------------------------------------------------------------------------------------------------------------------------------------------------------------------------|-------------------------------------|----------------|----------------------------------------------------------------------|
| <i>Expériences animées</i> funders | Characteristics <ul style="list-style-type: none"> <li>• Acceptation of the intervention</li> <li>• Opinion about the intervention and its effects on pupils</li> <li>• Interest about <i>Expériences animées</i></li> </ul> Facilities and difficulties to fund <i>Expériences Animées</i> , barriers and facilitators | Semi-structured interviews (IF) (3) | September 2019 | 3 people from the funding organization of <i>Expériences Animées</i> |
|------------------------------------|-------------------------------------------------------------------------------------------------------------------------------------------------------------------------------------------------------------------------------------------------------------------------------------------------------------------------|-------------------------------------|----------------|----------------------------------------------------------------------|

---

810

1  
2  
3 811  
4 812 **Table 2: Sources of questions included in T0 Questionnaire**  
5 813  
6 814  
7

| SURVEY ITEMS                                              | REFERENCE         |
|-----------------------------------------------------------|-------------------|
| <b>General characteristics</b>                            |                   |
| Sex, Age                                                  | -                 |
| Geographic Environment                                    | -                 |
|                                                           | -                 |
|                                                           | -                 |
| Family environment                                        | HBSC              |
|                                                           | HBSC              |
|                                                           | HBSC              |
|                                                           | HBSC              |
|                                                           | HBSC              |
| Socio-economic situation                                  | -                 |
|                                                           | -                 |
| School climate                                            | HBSC/Unplugged    |
| <b>Substance consumption and health care use</b>          |                   |
| Use of support service                                    | -                 |
| Alcohol consumption                                       | HBSC (modified)   |
|                                                           | HBSC (modified)   |
|                                                           | -                 |
| Heavy drinking episodes                                   | HBSC (modified)   |
|                                                           | HBSC (modified)   |
|                                                           | ESPAD (modified)  |
| Cannabis consumption                                      | HBSC (modified)   |
|                                                           | -                 |
| Tobacco consumption                                       | HBSC (modified)   |
|                                                           | -                 |
|                                                           | Unplugged         |
| <b>Representations about substance use and influences</b> |                   |
| Social influences                                         |                   |
| <i>Cannabis</i>                                           | EROPP             |
|                                                           | EMCDDA (modified) |
|                                                           | EMCDDA (modified) |
| <i>Alcohol</i>                                            | ISRD (modified)   |
|                                                           | ISRD              |
|                                                           | EMCDDA (modified) |
|                                                           | EMCDDA (modified) |
|                                                           |                   |
| <i>Tobacco</i>                                            | EMCDDA (modified) |
|                                                           | EMCDDA (modified) |
|                                                           |                   |
|                                                           |                   |
| Beliefs in consequences                                   |                   |

1  
2  
3  
4  
5  
6  
7  
8  
9  
10  
11  
12  
13  
14  
15  
16  
17  
18  
19  
20  
21  
22  
23  
24  
25  
26  
27  
28  
29  
30  
31  
32  
33  
34  
35  
36  
37  
38  
39  
40  
41  
42  
43  
44  
45  
46  
47  
48  
49  
50  
51  
52  
53  
54  
55  
56  
57  
58  
59  
60

|  |                                     |                                |
|--|-------------------------------------|--------------------------------|
|  |                                     | Unplugged/emcdda<br>(modified) |
|  | <i>Alcohol</i>                      |                                |
|  | <i>Cannabis</i>                     | Unplugged (modified)           |
|  | Portrayal of use                    |                                |
|  | <i>Alcohol</i>                      | DMQ-R                          |
|  | <i>Cannabis</i>                     | DMQ-R                          |
|  | Knowledge                           |                                |
|  | <i>Alcohol</i>                      | EROPP (modified)               |
|  |                                     | EROPP (modified)               |
|  | <i>Cannabis</i>                     | EROPP                          |
|  |                                     | EROPP                          |
|  | History of effects of use and abuse | Unplugged/Emcdda<br>(modified) |
|  |                                     | -                              |

### Life Skills

|                                             |                         |
|---------------------------------------------|-------------------------|
| Peer pressure resistance                    | Unplugged               |
|                                             | Peer pressure Inventory |
|                                             | Unplugged               |
| Decision making and problem solving ability | Unplugged               |
| Creative and critical thinking              | Unplugged               |
| Communication and interpersonal skills      | Unplugged               |
| Self awareness and empathy                  | Unplugged               |
| Assertiveness                               | Unplugged               |
| Coping with emotion and stress ability      | Unplugged               |

815  
816  
817  
818  
819  
820  
821  
822  
823

HBSC, Health Behavior n School-Aged Children; ESPADD, European School Survey on Alcohol and Other Drugs; EROPP, Enquête sur les Représentations, Opinions et Perceptions relatives aux Psychotropes i.e. Survey on Representations, Views and Perceptions of Psychotropic Drugs; ISRD, International Self Report Delinquency; EMCDDA, European Monitoring Centre for Drugs and Drug Addiction; DMQ-R, Drinking Motives Questionnaire, Revised.

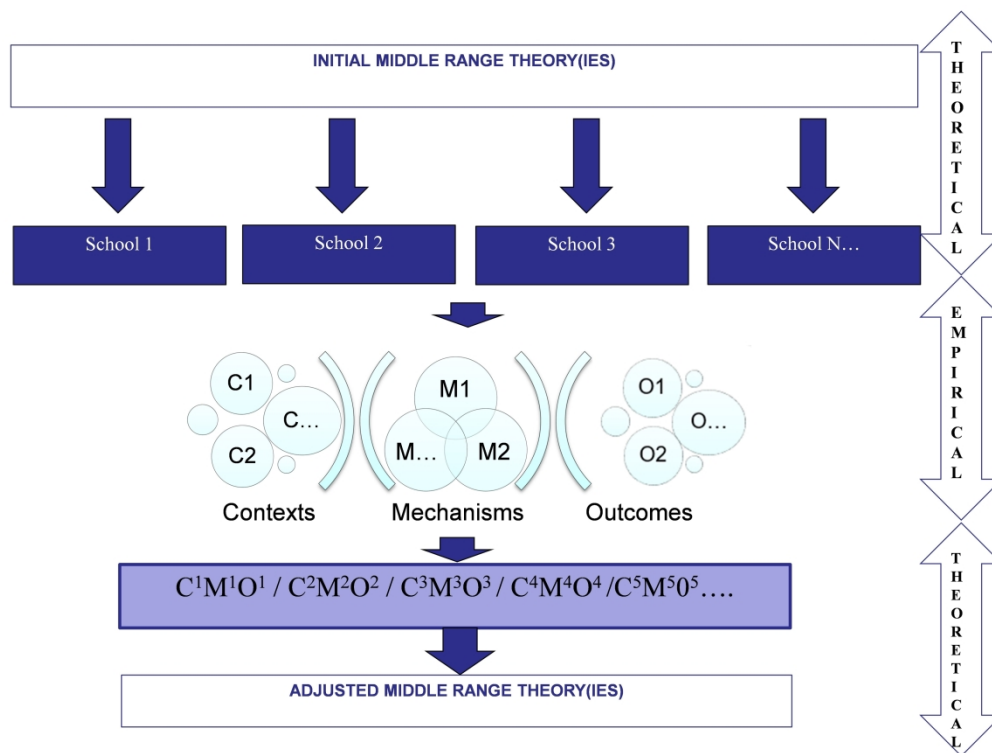

The realistic approach and the way to refine middle range theories applied to ERIEAS study.

381x285mm (300 x 300 DPI)

1  
2  
3  
4  
5  
6  
7  
8  
9  
10  
11  
12  
13  
14  
15  
16  
17  
18  
19  
20  
21  
22  
23  
24  
25  
26  
27  
28  
29  
30  
31  
32  
33  
34  
35  
36  
37  
38  
39  
40  
41  
42  
43  
44  
45  
46  
47  
48  
49  
50  
51  
52  
53  
54  
55  
56  
57  
58  
59  
60

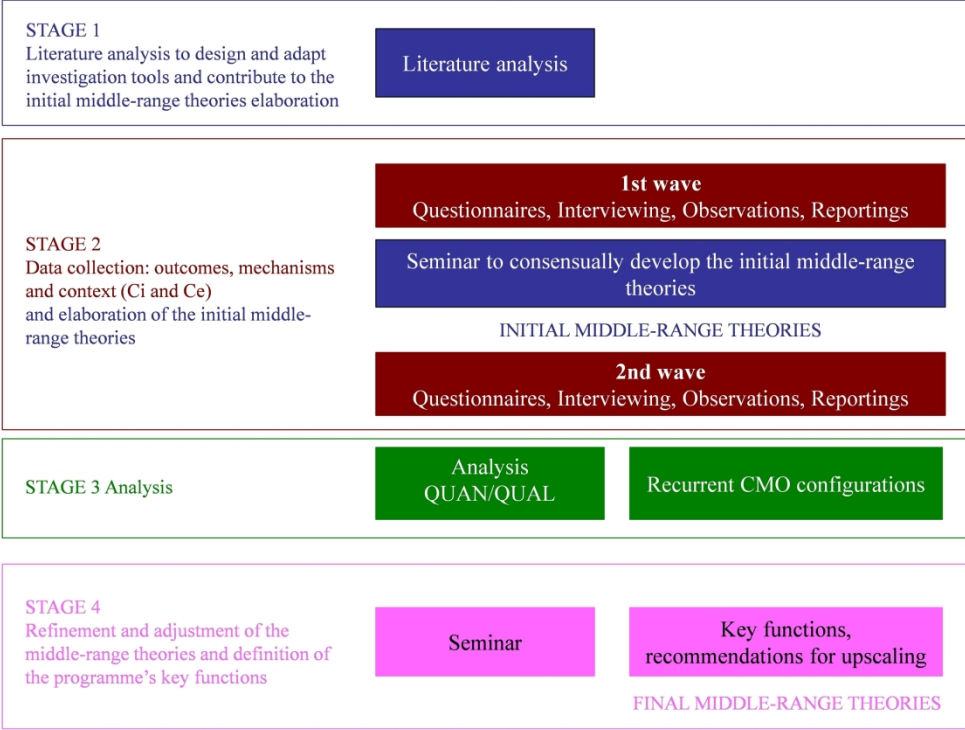

Stages of the ERIEAS study.  
254x190mm (300 x 300 DPI)

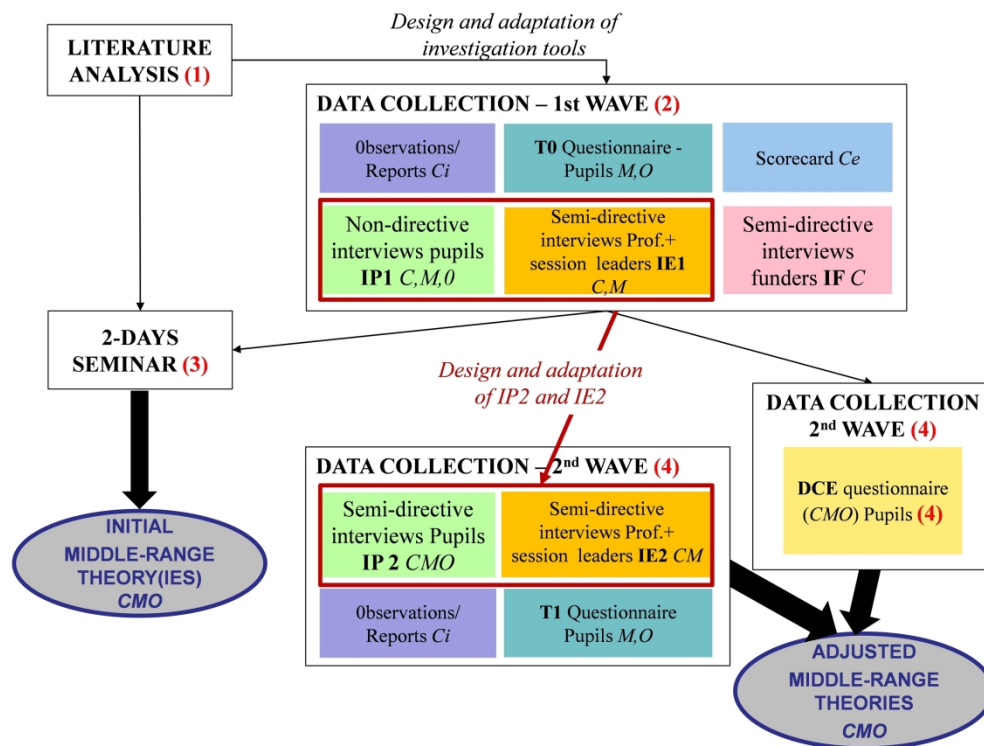

Different modalities of data collection and their links with the middle-range theories.

254x190mm (300 x 300 DPI)

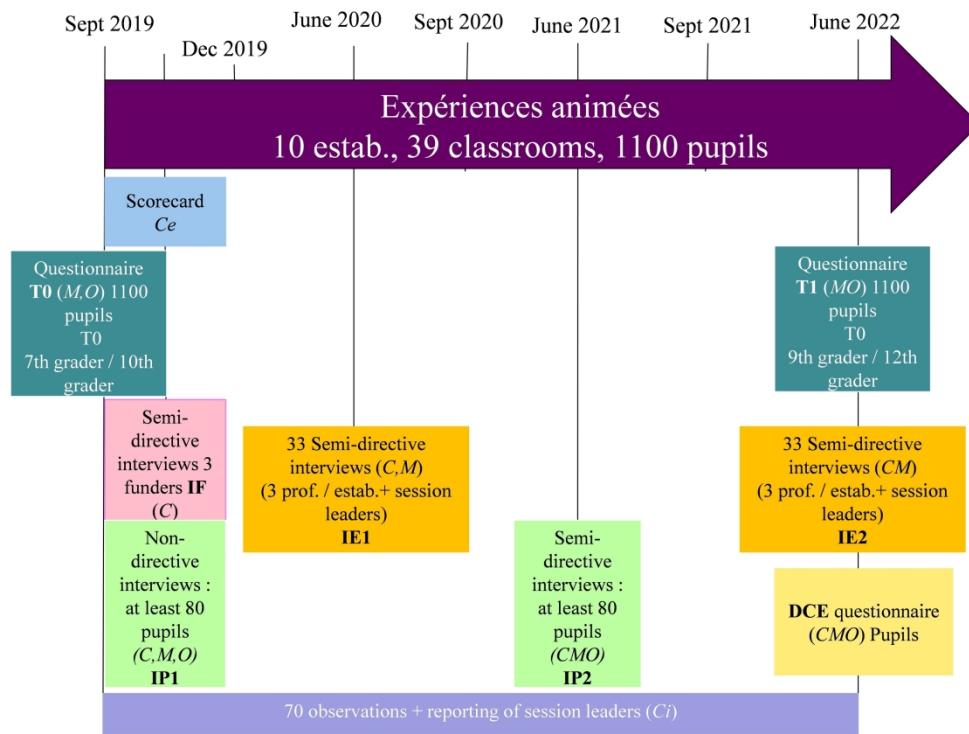

Timeline of the data collection.

254x190mm (300 x 300 DPI)



| BMJ Open            |    |                                                                                                                                                                                                                                                                                                                                                                                                                                                                                                                                                                                                                                                                                                                                                                                              | Reported in document Y/N/Unclear | Page(s) in document |
|---------------------|----|----------------------------------------------------------------------------------------------------------------------------------------------------------------------------------------------------------------------------------------------------------------------------------------------------------------------------------------------------------------------------------------------------------------------------------------------------------------------------------------------------------------------------------------------------------------------------------------------------------------------------------------------------------------------------------------------------------------------------------------------------------------------------------------------|----------------------------------|---------------------|
| TITLE               |    |                                                                                                                                                                                                                                                                                                                                                                                                                                                                                                                                                                                                                                                                                                                                                                                              |                                  |                     |
| 1                   |    | In the title, identify the document as a realist evaluation                                                                                                                                                                                                                                                                                                                                                                                                                                                                                                                                                                                                                                                                                                                                  | Y                                | 1                   |
| SUMMARY OR ABSTRACT |    |                                                                                                                                                                                                                                                                                                                                                                                                                                                                                                                                                                                                                                                                                                                                                                                              |                                  |                     |
| 2                   | 2  | Journal articles will usually require an abstract, while reports and other forms of publication will usually benefit from a short summary. The abstract or summary should include brief details on: the policy, programme or initiative under evaluation; programme setting; purpose of the evaluation; evaluation question(s) and/or objective(s); evaluation strategy; data collection, documentation and analysis methods; key findings and conclusions Where journals require it and the nature of the study is appropriate, brief details of respondents to the evaluation and recruitment and sampling processes may also be included Sufficient detail should be provided to identify that a realist approach was used and that realist programme theory was developed and/or refined | Y                                | 2                   |
| INTRODUCTION        |    |                                                                                                                                                                                                                                                                                                                                                                                                                                                                                                                                                                                                                                                                                                                                                                                              |                                  |                     |
| 3                   | 3  | Rationale for evaluation Explain the purpose of the evaluation and the implications for its focus and design                                                                                                                                                                                                                                                                                                                                                                                                                                                                                                                                                                                                                                                                                 | Y                                | 4                   |
| 4                   | 4  | Programme theory Describe the initial programme theory (or theories) that underpin the programme, policy or initiative                                                                                                                                                                                                                                                                                                                                                                                                                                                                                                                                                                                                                                                                       | Y                                | 4                   |
| 5                   | 5  | Evaluation questions, objectives and focus State the evaluation question(s) and specify the objectives for the evaluation. Describe whether and how the programme theory was used to define the scope and focus of the evaluation                                                                                                                                                                                                                                                                                                                                                                                                                                                                                                                                                            | Y                                | 5                   |
| 6                   | 6  | Ethical approval State whether the realist evaluation required and has gained ethical approval from the relevant authorities, providing details as appropriate. If ethical approval was deemed unnecessary, explain why                                                                                                                                                                                                                                                                                                                                                                                                                                                                                                                                                                      | Y                                | 2 and 22            |
| METHODS             |    |                                                                                                                                                                                                                                                                                                                                                                                                                                                                                                                                                                                                                                                                                                                                                                                              |                                  |                     |
| 7                   | 7  | Rationale for using realist evaluation Explain why a realist evaluation approach was chosen and (if relevant) adapted                                                                                                                                                                                                                                                                                                                                                                                                                                                                                                                                                                                                                                                                        | Y                                | 8                   |
| 8                   | 8  | Environment surrounding the evaluation Describe the environment in which the evaluation took place                                                                                                                                                                                                                                                                                                                                                                                                                                                                                                                                                                                                                                                                                           | Y                                | 6                   |
| 9                   | 9  | Describe the programme policy, initiative or product evaluated Provide relevant details on the programme, policy or initiative evaluated                                                                                                                                                                                                                                                                                                                                                                                                                                                                                                                                                                                                                                                     | Y                                | 9                   |
| 10                  | 10 | Describe and justify the evaluation design A description and justification of the evaluation design (i.e. the account of what was planned, done and why) should be included, at least in summary form or as an appendix, in the document which presents the main findings. If this is not done, the omission should be justified and a reference or link to the evaluation design given. It may also be useful to publish or make freely available (e.g. online on a website) any original evaluation design document or protocol, where they exist                                                                                                                                                                                                                                          | Y                                | 12                  |
| 11                  | 11 | Data collection methods Describe and justify the data collection methods – which ones were used, why and how they fed into developing, supporting, refuting or refining programme theory Provide details of the steps taken to enhance the trustworthiness of data collection and documentation                                                                                                                                                                                                                                                                                                                                                                                                                                                                                              | Y                                | 13-18               |
| 12                  | 12 | Recruitment process and sampling strategy Describe how respondents to the evaluation were recruited or engaged and how the sample contributed to the development, support, refutation or refinement of programme theory                                                                                                                                                                                                                                                                                                                                                                                                                                                                                                                                                                      | Y                                | 11                  |
| 13                  | 13 | Data analysis Describe in detail how data were analysed. This section should include information on the constructs that were identified, the process of analysis, how the programme theory was further developed, supported, refuted and refined, and (where relevant) how analysis changed as the evaluation unfolded                                                                                                                                                                                                                                                                                                                                                                                                                                                                       | Y                                | 18-20               |
| RESULTS             |    |                                                                                                                                                                                                                                                                                                                                                                                                                                                                                                                                                                                                                                                                                                                                                                                              |                                  |                     |
| 14                  | 14 | Details of participants Report (if applicable) who took part in the evaluation, the details of the data they provided and how the data was used to develop, support, refute or refine programme theory                                                                                                                                                                                                                                                                                                                                                                                                                                                                                                                                                                                       | Y                                | 17 AND 28-33        |
| 15                  | 15 | Main findings Present the key findings, linking them to contexts, mechanisms and outcome configurations. Show how they were used to further develop, test or refine the programme theory                                                                                                                                                                                                                                                                                                                                                                                                                                                                                                                                                                                                     | y                                | 20                  |
| DISCUSSION          |    |                                                                                                                                                                                                                                                                                                                                                                                                                                                                                                                                                                                                                                                                                                                                                                                              |                                  |                     |
| 16                  | 16 | Summary of findings Summarise the main findings with attention to the evaluation questions, purpose of the evaluation, programme theory and intended audience                                                                                                                                                                                                                                                                                                                                                                                                                                                                                                                                                                                                                                | y                                | 21                  |
| 17                  | 17 | Strengths, limitations and future directions Discuss both the strengths of the evaluation and its limitations. These should include (but need not be limited to): (1) consideration of all the steps in the evaluation processes; and (2) comment on the adequacy, trustworthiness and value of the explanatory insights which emerged in many evaluations, there will be an expectation to provide guidance on future directions for the programme, policy or initiative, its implementation and/or design. The particular implications arising from the realist nature of the findings should be reflected in these discussions                                                                                                                                                            | y                                | 22                  |
| 18                  | 18 | Comparison with existing literature Where appropriate, compare and contrast the evaluation's findings with the existing literature on similar programmes, policies or initiatives                                                                                                                                                                                                                                                                                                                                                                                                                                                                                                                                                                                                            | NOT APPLICABLE                   |                     |
| 19                  | 19 | Conclusion and recommendations List the main conclusions that are justified by the analyses of the data. If appropriate, offer recommendations consistent with a realist approach                                                                                                                                                                                                                                                                                                                                                                                                                                                                                                                                                                                                            | NOT APPLICABLE                   |                     |
| 20                  | 20 | Funding and conflict of interest State the funding source (if any) for the evaluation, the role played by the funder (if any) and any conflicts of interests of the evaluators                                                                                                                                                                                                                                                                                                                                                                                                                                                                                                                                                                                                               | Y                                | 26                  |
